# Supplementary material for: Z-score growth reference data for Saudi preschool children
Source: PubMed Central journal article supplement — Ann Saudi Med. 2017 Jan-Feb;37(1):10–5. doi: 10.5144/0256-4947.2017.10 (PMC6148975; doi:10.5144/0256-4947.2017.10), 2017
Supplement: asm-37-1-10-s001.pdf [file asm-37-1-10-s001.pdf]

**Appendix 1.** L, M, and S parameters and z scores for weight for age: boys 0 to 60 months.

| Age (M) | L         | M        | S        | -3       | -2       | -1       | 0        | 1        | 2        | 3        |
|---------|-----------|----------|----------|----------|----------|----------|----------|----------|----------|----------|
| 0       | -1.09093  | 3.15546  | 0.141163 | 2.254274 | 2.46826  | 2.769087 | 3.15546  | 3.674826 | 4.417946 | 5.397499 |
| 1       | -0.99975  | 4.058456 | 0.142658 | 2.877089 | 3.159147 | 3.554219 | 4.058456 | 4.729391 | 5.673368 | 6.885382 |
| 2       | -0.90965  | 4.918971 | 0.144109 | 3.459706 | 3.810123 | 4.299035 | 4.918971 | 5.735362 | 6.865099 | 8.279882 |
| 3       | -0.82161  | 5.705798 | 0.145487 | 3.981296 | 4.397883 | 4.976743 | 5.705798 | 6.655948 | 7.949677 | 9.532265 |
| 4       | -0.73615  | 6.408007 | 0.146771 | 4.435901 | 4.915244 | 5.578457 | 6.408007 | 7.477946 | 8.912091 | 10.62833 |
| 5       | -0.65355  | 7.02606  | 0.147948 | 4.825652 | 5.363878 | 6.105247 | 7.02606  | 8.201496 | 9.753344 | 11.57272 |
| 6       | -0.57373  | 7.56454  | 0.149006 | 5.15543  | 5.748542 | 6.56173  | 7.56454  | 8.831564 | 10.48    | 12.37584 |
| 7       | -0.49708  | 8.030624 | 0.149937 | 5.431933 | 6.07596  | 6.954738 | 8.030624 | 9.376283 | 11.10259 | 13.05276 |
| 8       | -0.42457  | 8.435232 | 0.150737 | 5.664466 | 6.355683 | 7.294293 | 8.435232 | 9.84833  | 11.63726 | 13.62525 |
| 9       | -0.35686  | 8.789712 | 0.151402 | 5.862376 | 6.597405 | 7.590703 | 8.789712 | 10.26091 | 12.10052 | 14.11455 |
| 10      | -0.2939   | 9.103397 | 0.151925 | 6.033235 | 6.809033 | 7.852428 | 9.103397 | 10.62477 | 12.50543 | 14.5367  |
| 11      | -0.23487  | 9.383076 | 0.152296 | 6.182369 | 6.996242 | 8.085623 | 9.383076 | 10.94758 | 12.86085 | 14.90181 |
| 12      | -0.17895  | 9.63423  | 0.152509 | 6.313954 | 7.163531 | 8.295222 | 9.63423  | 11.23555 | 13.17391 | 15.21784 |
| 13      | -0.12549  | 9.861126 | 0.152565 | 6.431231 | 7.314399 | 8.485065 | 9.861126 | 11.49351 | 13.4502  | 15.49114 |
| 14      | -7.55E-02 | 10.06911 | 0.152476 | 6.538693 | 7.453364 | 8.659899 | 10.06911 | 11.728   | 13.69832 | 15.73304 |
| 15      | -0.0303   | 10.26294 | 0.152266 | 6.640428 | 7.584436 | 8.823895 | 10.26294 | 11.94497 | 13.92628 | 15.95421 |
| 16      | 9.24E-03  | 10.44608 | 0.151955 | 6.739524 | 7.710561 | 8.980074 | 10.44608 | 12.14885 | 14.14008 | 16.16257 |
| 17      | 4.25E-02  | 10.62114 | 0.151562 | 6.838275 | 7.833909 | 9.130675 | 10.62114 | 12.34299 | 14.34423 | 16.3639  |
| 18      | 6.90E-02  | 10.78963 | 0.151106 | 6.938037 | 7.9557   | 9.276942 | 10.78963 | 12.52943 | 14.54152 | 16.56177 |
| 19      | 8.88E-02  | 10.95275 | 0.150603 | 7.039696 | 8.076787 | 9.419827 | 10.95275 | 12.70978 | 14.73408 | 16.75868 |
| 20      | 0.101967  | 11.11209 | 0.150071 | 7.144234 | 8.198218 | 9.560575 | 11.11209 | 12.8861  | 14.92449 | 16.9577  |
| 21      | 0.108643  | 11.26888 | 0.149521 | 7.252258 | 8.320716 | 9.700115 | 11.26888 | 13.05993 | 15.11465 | 17.16091 |
| 22      | 0.109259  | 11.42404 | 0.148964 | 7.36405  | 8.444742 | 9.83915  | 11.42404 | 13.23245 | 15.30588 | 17.36965 |
| 23      | 0.104383  | 11.57844 | 0.148409 | 7.479639 | 8.570594 | 9.97827  | 11.57844 | 13.40471 | 15.49929 | 17.58492 |
| 24      | 9.46E-02  | 11.73279 | 0.147864 | 7.598905 | 8.69844  | 10.11795 | 11.73279 | 13.57756 | 15.69575 | 17.80745 |

Source: El Mouzan MI, Shaffi A, Al Salloum A, Alqurashi MM, Al Herbish A, Al Omer A. Z-score growth reference data for Saudi preschool children. Ann Saudi Med 2017; 37(1): 10-15.

|    |           |          |          |          |          |          |          |          |          |          |
|----|-----------|----------|----------|----------|----------|----------|----------|----------|----------|----------|
| 25 | 8.07E-02  | 11.88726 | 0.147332 | 7.721405 | 8.828088 | 10.25821 | 11.88726 | 13.75116 | 15.89522 | 18.03686 |
| 26 | 6.35E-02  | 12.04148 | 0.146814 | 7.846224 | 8.958902 | 10.39865 | 12.04148 | 13.92498 | 16.09674 | 18.2715  |
| 27 | 4.40E-02  | 12.19514 | 0.146313 | 7.97235  | 9.090194 | 10.53885 | 12.19514 | 14.09861 | 16.29946 | 18.50981 |
| 28 | 2.25E-02  | 12.34842 | 0.145837 | 8.09938  | 9.221774 | 10.67881 | 12.34842 | 14.27231 | 16.50365 | 18.752   |
| 29 | -5.17E-04 | 12.50171 | 0.145394 | 8.227187 | 9.353677 | 10.81877 | 12.50171 | 14.44659 | 16.70995 | 18.99883 |
| 30 | -2.49E-02 | 12.65535 | 0.144988 | 8.355629 | 9.485934 | 10.95893 | 12.65535 | 14.62195 | 16.91895 | 19.25097 |
| 31 | -0.05021  | 12.80958 | 0.144624 | 8.48442  | 9.618439 | 11.09936 | 12.80958 | 14.79868 | 17.13095 | 19.50863 |
| 32 | -7.60E-02 | 12.96442 | 0.144306 | 8.613172 | 9.750967 | 11.24    | 12.96442 | 14.97682 | 17.34586 | 19.77153 |
| 33 | -0.10181  | 13.11946 | 0.144034 | 8.741249 | 9.883008 | 11.38043 | 13.11946 | 15.15586 | 17.56292 | 20.03845 |
| 34 | -0.12709  | 13.27419 | 0.143804 | 8.86799  | 10.014   | 11.52016 | 13.27419 | 15.33511 | 17.78102 | 20.30766 |
| 35 | -0.15154  | 13.4285  | 0.143615 | 8.993131 | 10.14376 | 11.65906 | 13.4285  | 15.51437 | 17.99972 | 20.57837 |
| 36 | -0.175    | 13.58262 | 0.143467 | 9.11669  | 10.27237 | 11.7973  | 13.58262 | 15.69393 | 18.21933 | 20.85078 |
| 37 | -0.19718  | 13.73682 | 0.143363 | 9.238561 | 10.39985 | 11.93504 | 13.73682 | 15.87412 | 18.44014 | 21.12501 |
| 38 | -0.21777  | 13.89111 | 0.143304 | 9.358454 | 10.52602 | 12.07221 | 13.89111 | 16.05496 | 18.66199 | 21.40055 |
| 39 | -0.23636  | 14.04535 | 0.143291 | 9.475982 | 10.65061 | 12.20861 | 14.04535 | 16.2362  | 18.88435 | 21.67626 |
| 40 | -0.25256  | 14.19928 | 0.143322 | 9.590667 | 10.77322 | 12.34399 | 14.19928 | 16.4175  | 19.10652 | 21.95081 |
| 41 | -0.26613  | 14.3529  | 0.143403 | 9.702159 | 10.89363 | 12.4782  | 14.3529  | 16.59891 | 19.32847 | 22.22388 |
| 42 | -0.2768   | 14.50574 | 0.14354  | 9.809748 | 11.01121 | 12.61073 | 14.50574 | 16.77995 | 19.54958 | 22.49443 |
| 43 | -0.2843   | 14.65705 | 0.143736 | 9.91253  | 11.12511 | 12.7408  | 14.65705 | 16.95981 | 19.76874 | 22.7608  |
| 44 | -0.28835  | 14.8058  | 0.143997 | 10.00942 | 11.23432 | 12.86741 | 14.8058  | 17.13731 | 19.98442 | 23.0208  |
| 45 | -0.2888   | 14.95113 | 0.144322 | 10.09955 | 11.33797 | 12.98973 | 14.95113 | 17.31145 | 20.19528 | 23.27256 |
| 46 | -0.28562  | 15.0925  | 0.144711 | 10.18244 | 11.43562 | 13.10728 | 15.0925  | 17.4816  | 20.40051 | 23.51491 |
| 47 | -0.27908  | 15.23008 | 0.145163 | 10.2583  | 11.52742 | 13.22021 | 15.23008 | 17.64794 | 20.60035 | 23.74824 |
| 48 | -0.26951  | 15.36432 | 0.145671 | 10.32767 | 11.61389 | 13.32899 | 15.36432 | 17.81099 | 20.79549 | 23.97356 |
| 49 | -0.25719  | 15.49547 | 0.146231 | 10.39087 | 11.69532 | 13.43388 | 15.49547 | 17.97097 | 20.98621 | 24.19134 |
| 50 | -0.24227  | 15.6234  | 0.146843 | 10.44785 | 11.77163 | 13.5348  | 15.6234  | 18.12778 | 21.17244 | 24.40158 |
| 51 | -0.22503  | 15.74815 | 0.147508 | 10.49866 | 11.84286 | 13.63176 | 15.74815 | 18.28148 | 21.35443 | 24.60492 |
| 52 | -0.20584  | 15.86997 | 0.148222 | 10.54364 | 11.90931 | 13.72501 | 15.86997 | 18.43243 | 21.53277 | 24.80243 |

Source: El Mouzan MI, Shaffi A, Al Salloum A, Alqurashi MM, Al Herbish A, Al Omer A. Z-score growth reference data for Saudi preschool children. Ann Saudi Med 2017; 37(1): 10-15.

|    |           |          |          |          |          |          |          |          |          |          |
|----|-----------|----------|----------|----------|----------|----------|----------|----------|----------|----------|
| 53 | -0.1849   | 15.98917 | 0.148985 | 10.58311 | 11.97128 | 13.81486 | 15.98917 | 18.58097 | 21.70794 | 24.99486 |
| 54 | -0.16235  | 16.10551 | 0.149794 | 10.61693 | 12.02863 | 13.90114 | 16.10551 | 18.72681 | 21.8796  | 25.18188 |
| 55 | -0.13836  | 16.21873 | 0.150645 | 10.64505 | 12.08125 | 13.98365 | 16.21873 | 18.86958 | 22.04735 | 25.36316 |
| 56 | -0.1132   | 16.32892 | 0.151533 | 10.66775 | 12.12937 | 14.06255 | 16.32892 | 19.00935 | 22.21131 | 25.53905 |
| 57 | -8.72E-02 | 16.4365  | 0.152453 | 10.68571 | 12.17356 | 14.13834 | 16.4365  | 19.14656 | 22.3721  | 25.7106  |
| 58 | -0.06084  | 16.54207 | 0.153395 | 10.69993 | 12.21468 | 14.2117  | 16.54207 | 19.28183 | 22.53061 | 25.8792  |
| 59 | -0.03453  | 16.64629 | 0.154351 | 10.71144 | 12.25363 | 14.28338 | 16.64629 | 19.41588 | 22.68781 | 26.04635 |
| 60 | -8.51E-03 | 16.74977 | 0.155315 | 10.72106 | 12.29112 | 14.35404 | 16.74977 | 19.54932 | 22.84447 | 26.21312 |

Source: El Mouzan MI, Shaffi A, Al Salloum A, Alqurashi MM, Al Herbish A, Al Omer A. Z-score growth reference data for Saudi preschool children. Ann Saudi Med 2017; 37(1): 10-15.
