# Supplementary material for: Z-score growth reference data for Saudi preschool children
Source: PubMed Central journal article supplement — Ann Saudi Med. 2017 Jan-Feb;37(1):10–5. doi: 10.5144/0256-4947.2017.10 (PMC6148975; doi:10.5144/0256-4947.2017.10), 2017
Supplement: asm-37-1-10-s002.pdf [file asm-37-1-10-s002.pdf]

**Appendix 2.** L, M, and S parameters and z score for length/height for age: boys 0 to 60 months.

| Age (M) | L          | M        | S      | -3       | -2       | -1       | 0        | 1        | 2        | 3        |
|---------|------------|----------|--------|----------|----------|----------|----------|----------|----------|----------|
| 0       | -1.87751   | 50.57602 | 0.0493 | 44.82788 | 46.21217 | 48.25975 | 50.57602 | 53.244   | 56.38376 | 59.12834 |
| 1       | -1.875372  | 53.74355 | 0.0507 | 47.47713 | 48.98096 | 51.21139 | 53.74355 | 56.67268 | 60.13776 | 63.18356 |
| 2       | -1.822278  | 56.81033 | 0.0521 | 50.02127 | 51.64881 | 54.06478 | 56.81033 | 59.98968 | 63.75504 | 67.06822 |
| 3       | -1.681525  | 59.67986 | 0.0532 | 52.36938 | 54.1276  | 56.73127 | 59.67986 | 63.0789  | 67.08037 | 70.57738 |
| 4       | -1.427597  | 62.30298 | 0.0539 | 54.4682  | 56.36948 | 59.16587 | 62.30298 | 65.87703 | 70.02219 | 73.58617 |
| 5       | -1.040973  | 64.65456 | 0.0543 | 56.27753 | 58.34317 | 61.34385 | 64.65456 | 68.35168 | 72.53635 | 76.04354 |
| 6       | -0.4877291 | 66.72834 | 0.0545 | 57.75378 | 60.02363 | 63.25488 | 66.72834 | 70.49335 | 74.6111  | 77.94648 |
| 7       | 0.2181983  | 68.53925 | 0.0544 | 58.87507 | 61.40789 | 64.90859 | 68.53925 | 72.32677 | 76.30225 | 79.40141 |
| 8       | 0.9908746  | 70.13326 | 0.0543 | 59.68019 | 62.54087 | 66.3484  | 70.13326 | 73.91999 | 77.73318 | 80.60061 |
| 9       | 1.735161   | 71.56539 | 0.0542 | 60.24654 | 63.49252 | 67.6307  | 71.56539 | 75.34705 | 79.01737 | 81.69571 |
| 10      | 2.366868   | 72.88995 | 0.0541 | 60.69356 | 64.35099 | 68.81549 | 72.88995 | 76.67468 | 80.24224 | 82.78749 |
| 11      | 2.825259   | 74.14188 | 0.0540 | 61.16105 | 65.19634 | 69.9447  | 74.14188 | 77.94505 | 81.4585  | 83.92789 |
| 12      | 3.061383   | 75.33276 | 0.0540 | 61.8143  | 66.10107 | 71.04093 | 75.33276 | 79.17231 | 82.68396 | 85.13416 |
| 13      | 3.052275   | 76.46193 | 0.0539 | 62.77931 | 67.11347 | 72.11369 | 76.46193 | 80.35452 | 83.91646 | 86.40266 |
| 14      | 2.851255   | 77.5274  | 0.0538 | 63.9856  | 68.20135 | 73.15467 | 77.5274  | 81.48573 | 85.1396  | 87.70614 |
| 15      | 2.533357   | 78.52913 | 0.0537 | 65.2865  | 69.30466 | 74.15193 | 78.52913 | 82.56099 | 86.33515 | 89.01373 |
| 16      | 2.158107   | 79.47268 | 0.0536 | 66.57682 | 70.38158 | 75.10133 | 79.47268 | 83.58185 | 87.49405 | 90.3064  |
| 17      | 1.78178    | 80.36989 | 0.0534 | 67.78763 | 71.40448 | 76.00518 | 80.36989 | 84.55663 | 88.61299 | 91.56889 |
| 18      | 1.449199   | 81.23001 | 0.0534 | 68.88184 | 72.35592 | 76.86494 | 81.23001 | 85.49211 | 89.68765 | 92.78408 |
| 19      | 1.174186   | 82.06313 | 0.0534 | 69.85961 | 73.23568 | 77.68559 | 82.06313 | 86.40034 | 90.72782 | 93.95711 |
| 20      | 0.9528638  | 82.8812  | 0.0535 | 70.74258 | 74.05724 | 78.47769 | 82.8812  | 87.29576 | 91.74973 | 95.10446 |
| 21      | 0.7820513  | 83.69051 | 0.0537 | 71.55103 | 74.83355 | 79.24943 | 83.69051 | 88.18358 | 92.75687 | 96.22733 |
| 22      | 0.66294    | 84.4917  | 0.0539 | 72.29609 | 75.57153 | 80.00418 | 84.4917  | 89.06104 | 93.74136 | 97.31229 |
| 23      | 0.6002053  | 85.27979 | 0.0541 | 72.97359 | 76.26687 | 80.73766 | 85.27979 | 89.92076 | 94.69071 | 98.34082 |
| 24      | 0.5933998  | 86.05149 | 0.0544 | 73.58066 | 76.91632 | 81.44664 | 86.05149 | 90.75879 | 95.59916 | 99.30464 |

Source: El Mouzan MI, Shaffi A, Al Salloum A, Alqurashi MM, Al Herbish A, Al Omer A. Z-score growth reference data for Saudi preschool children. Ann Saudi Med 2017; 37(1): 10-15.

|    |           |          |        |          |          |          |          |          |          |          |
|----|-----------|----------|--------|----------|----------|----------|----------|----------|----------|----------|
| 25 | 0.635819  | 86.8067  | 0.0547 | 74.12466 | 77.5245  | 82.1329  | 86.8067  | 91.57401 | 96.46542 | 100.2029 |
| 26 | 0.7158352 | 87.547   | 0.0550 | 74.61673 | 78.09861 | 82.79983 | 87.547   | 92.36848 | 97.2947  | 101.0451 |
| 27 | 0.8127472 | 88.27386 | 0.0552 | 75.07845 | 78.65152 | 83.45232 | 88.27386 | 93.14523 | 98.097   | 101.8503 |
| 28 | 0.9034683 | 88.98704 | 0.0554 | 75.53731 | 79.19872 | 84.09501 | 88.98704 | 93.90517 | 98.88058 | 102.6366 |
| 29 | 0.9808332 | 89.68436 | 0.0556 | 75.99998 | 79.74262 | 84.72683 | 89.68436 | 94.64715 | 99.6473  | 103.409  |
| 30 | 1.042002  | 90.36747 | 0.0558 | 76.47066 | 80.28564 | 85.34918 | 90.36747 | 95.37408 | 100.4022 | 104.1747 |
| 31 | 1.083874  | 91.04003 | 0.0559 | 76.9574  | 80.83346 | 85.96603 | 91.04003 | 96.09042 | 101.1513 | 104.9415 |
| 32 | 1.10336   | 91.70291 | 0.0560 | 77.46729 | 81.39027 | 86.57921 | 91.70291 | 96.79717 | 101.8968 | 105.7127 |
| 33 | 1.104824  | 92.35574 | 0.0561 | 77.99816 | 81.95515 | 87.1886  | 92.35574 | 97.49274 | 102.6347 | 106.482  |
| 34 | 1.097258  | 92.99917 | 0.0561 | 78.54322 | 82.52545 | 87.79451 | 92.99917 | 98.17564 | 103.3591 | 107.2388 |
| 35 | 1.088946  | 93.63506 | 0.0561 | 79.09068 | 83.09519 | 88.39621 | 93.63506 | 98.84794 | 104.0702 | 107.9803 |
| 36 | 1.084698  | 94.26514 | 0.0561 | 79.63136 | 83.6594  | 88.99288 | 94.26514 | 99.51254 | 104.7705 | 108.7082 |
| 37 | 1.081271  | 94.89258 | 0.0561 | 80.16847 | 84.22051 | 89.58679 | 94.89258 | 100.1743 | 105.4678 | 109.4325 |
| 38 | 1.068352  | 95.52284 | 0.0561 | 80.71821 | 84.78913 | 90.18433 | 95.52284 | 100.841  | 106.1746 | 110.1716 |
| 39 | 1.038443  | 96.1609  | 0.0561 | 81.29681 | 85.3765  | 90.79237 | 96.1609  | 101.5179 | 106.8989 | 110.9368 |
| 40 | 0.9886311 | 96.8083  | 0.0560 | 81.91278 | 85.98858 | 91.41418 | 96.8083  | 102.2058 | 107.6418 | 111.73   |
| 41 | 0.9214233 | 97.46544 | 0.0560 | 82.56316 | 86.62415 | 92.04984 | 97.46544 | 102.9048 | 108.4025 | 112.5496 |
| 42 | 0.8441233 | 98.12821 | 0.0559 | 83.23696 | 87.27615 | 92.69503 | 98.12821 | 103.6087 | 109.1709 | 113.3814 |
| 43 | 0.7616509 | 98.7894  | 0.0558 | 83.92781 | 87.93941 | 93.34442 | 98.7894  | 104.3069 | 109.9315 | 114.2052 |
| 44 | 0.6774815 | 99.44069 | 0.0556 | 84.62923 | 88.60797 | 93.99156 | 99.44069 | 104.9879 | 110.6683 | 115.0013 |
| 45 | 0.5995991 | 100.0754 | 0.0553 | 85.32943 | 89.27336 | 94.63016 | 100.0754 | 105.6419 | 111.3658 | 115.7476 |
| 46 | 0.5365254 | 100.689  | 0.0550 | 86.01534 | 89.9267  | 95.25487 | 100.689  | 106.2626 | 112.0128 | 116.4274 |
| 47 | 0.4959931 | 101.2785 | 0.0545 | 86.67228 | 90.55778 | 95.85997 | 101.2785 | 106.8471 | 112.6038 | 117.0312 |
| 48 | 0.4868464 | 101.8398 | 0.0541 | 87.28217 | 91.15382 | 96.4382  | 101.8398 | 107.3926 | 113.1344 | 117.5515 |
| 49 | 0.5115138 | 102.3732 | 0.0536 | 87.83341 | 91.7065  | 96.9855  | 102.3732 | 107.903  | 113.6123 | 117.9985 |
| 50 | 0.5623452 | 102.882  | 0.0532 | 88.32417 | 92.21362 | 97.50127 | 102.882  | 108.3889 | 114.0581 | 118.4026 |
| 51 | 0.6362491 | 103.3707 | 0.0529 | 88.75188 | 92.67393 | 97.98656 | 103.3707 | 108.8588 | 114.4862 | 118.7838 |
| 52 | 0.7322497 | 103.8417 | 0.0527 | 89.11469 | 93.08694 | 98.44243 | 103.8417 | 109.3172 | 114.9035 | 119.1513 |

Source: El Mouzan MI, Shaffi A, Al Salloum A, Alqurashi MM, Al Herbish A, Al Omer A. Z-score growth reference data for Saudi preschool children. Ann Saudi Med 2017; 37(1): 10-15.

|    |           |          |        |          |          |          |          |          |          |          |
|----|-----------|----------|--------|----------|----------|----------|----------|----------|----------|----------|
| 53 | 0.8491513 | 104.2983 | 0.0525 | 89.41448 | 93.45528 | 98.87194 | 104.2983 | 109.7675 | 115.3142 | 119.5104 |
| 54 | 0.9882629 | 104.7412 | 0.0525 | 89.64999 | 93.77944 | 99.27634 | 104.7412 | 110.2094 | 115.7165 | 119.8581 |
| 55 | 1.15059   | 105.1721 | 0.0525 | 89.81979 | 94.0603  | 99.65757 | 105.1721 | 110.6434 | 116.1095 | 120.1928 |
| 56 | 1.336068  | 105.5937 | 0.0526 | 89.92252 | 94.29928 | 100.0185 | 105.5937 | 111.0717 | 116.4952 | 120.5165 |
| 57 | 1.542959  | 106.0069 | 0.0528 | 89.95164 | 94.49361 | 100.3587 | 106.0069 | 111.4961 | 116.8768 | 120.8342 |
| 58 | 1.76704   | 106.4152 | 0.0531 | 89.90839 | 94.6468  | 100.6821 | 106.4152 | 111.9205 | 117.2595 | 121.1529 |
| 59 | 2.000533  | 106.8234 | 0.0534 | 89.80546 | 94.76972 | 100.9962 | 106.8234 | 112.3486 | 117.6479 | 121.4791 |
| 60 | 2.234134  | 107.2332 | 0.0537 | 89.66132 | 94.87531 | 101.3071 | 107.2332 | 112.7804 | 118.0428 | 121.8155 |

Source: El Mouzan MI, Shaffi A, Al Salloum A, Alqurashi MM, Al Herbish A, Al Omer A. Z-score growth reference data for Saudi preschool children. Ann Saudi Med 2017; 37(1): 10-15.
