# Supplementary material for: Z-score growth reference data for Saudi preschool children
Source: PubMed Central journal article supplement — Ann Saudi Med. 2017 Jan-Feb;37(1):10–5. doi: 10.5144/0256-4947.2017.10 (PMC6148975; doi:10.5144/0256-4947.2017.10), 2017
Supplement: asm-37-1-10-s004.pdf [file asm-37-1-10-s004.pdf]

**Appendix 4.** L, M, and S parameters and z score for weight for length/height: boys 0 to 60 months.

| Length (cm) | L         | M        | S        | -3       | -2       | -1       | 0        | 1        | 2        | 3        |
|-------------|-----------|----------|----------|----------|----------|----------|----------|----------|----------|----------|
| 55          | -5.22E-02 | 4.211174 | 0.15163  | 2.735242 | 3.119095 | 3.623867 | 4.211174 | 4.899473 | 5.712845 | 6.548293 |
| 56          | -4.52E-03 | 4.505047 | 0.150559 | 2.92206  | 3.336684 | 3.878794 | 4.505047 | 5.232942 | 6.085001 | 6.951499 |
| 57          | 4.09E-02  | 4.81281  | 0.149446 | 3.118406 | 3.565284 | 4.146272 | 4.81281  | 5.581453 | 6.473265 | 7.371871 |
| 58          | 0.083969  | 5.127459 | 0.148295 | 3.319972 | 3.799862 | 4.420338 | 5.127459 | 5.936845 | 6.868192 | 7.798707 |
| 59          | 0.124595  | 5.443422 | 0.147111 | 3.523377 | 4.036427 | 4.696239 | 5.443422 | 6.292678 | 7.262414 | 8.223768 |
| 60          | 0.162724  | 5.756722 | 0.1459   | 3.726268 | 4.272153 | 4.970579 | 5.756722 | 6.644396 | 7.650808 | 8.641435 |
| 61          | 0.198261  | 6.064595 | 0.144668 | 3.927082 | 4.505096 | 5.24099  | 6.064595 | 6.988877 | 8.029947 | 9.048053 |
| 62          | 0.231092  | 6.365169 | 0.143419 | 4.124819 | 4.733962 | 5.505864 | 6.365169 | 7.324058 | 8.397649 | 9.4414   |
| 63          | 0.261121  | 6.657638 | 0.142159 | 4.319142 | 4.958216 | 5.764497 | 6.657638 | 7.64911  | 8.753157 | 9.820849 |
| 64          | 0.28827   | 6.941967 | 0.140895 | 4.510187 | 5.177883 | 6.016844 | 6.941967 | 7.964096 | 9.096718 | 10.18688 |
| 65          | 0.312562  | 7.218402 | 0.13963  | 4.698201 | 5.393157 | 6.263091 | 7.218402 | 8.269394 | 9.42891  | 10.54029 |
| 66          | 0.334069  | 7.487235 | 0.13837  | 4.883406 | 5.604229 | 6.503452 | 7.487235 | 8.565426 | 9.750335 | 10.88186 |
| 67          | 0.352939  | 7.748405 | 0.137119 | 5.065726 | 5.810996 | 6.737824 | 7.748405 | 8.852207 | 10.0611  | 11.2118  |
| 68          | 0.369348  | 8.001916 | 0.135882 | 5.245079 | 6.013372 | 6.966153 | 8.001916 | 9.129822 | 10.36139 | 11.53034 |
| 69          | 0.383448  | 8.247896 | 0.134663 | 5.421443 | 6.211357 | 7.188489 | 8.247896 | 9.398495 | 10.65153 | 11.83792 |
| 70          | 0.395238  | 8.486559 | 0.133466 | 5.594887 | 6.405026 | 7.404957 | 8.486559 | 9.658567 | 10.93202 | 12.13521 |
| 71          | 0.404724  | 8.718436 | 0.132295 | 5.76567  | 6.594688 | 7.615957 | 8.718436 | 9.91074  | 11.20376 | 12.42328 |
| 72          | 0.411951  | 8.944277 | 0.131155 | 5.93418  | 6.78081  | 7.822082 | 8.944277 | 10.15594 | 11.46789 | 12.70349 |
| 73          | 0.416991  | 9.165001 | 0.130048 | 6.100902 | 6.963991 | 8.024079 | 9.165001 | 10.39529 | 11.72573 | 12.97733 |
| 74          | 0.419897  | 9.381637 | 0.128975 | 6.266417 | 7.144925 | 8.222801 | 9.381637 | 10.63    | 11.97872 | 13.24644 |
| 75          | 0.420712  | 9.595027 | 0.127938 | 6.431197 | 7.324183 | 8.418945 | 9.595027 | 10.86108 | 12.22803 | 13.51216 |
| 76          | 0.419462  | 9.805567 | 0.126937 | 6.595432 | 7.502007 | 8.612824 | 9.805567 | 11.08901 | 12.47425 | 13.77517 |
| 77          | 0.416212  | 10.01347 | 0.125973 | 6.759151 | 7.678476 | 8.804582 | 10.01347 | 11.31409 | 12.71774 | 14.0359  |
| 78          | 0.411028  | 10.21898 | 0.125048 | 6.922385 | 7.853685 | 8.99439  | 10.21898 | 11.53665 | 12.95893 | 14.29487 |
| 79          | 0.403992  | 10.42232 | 0.124165 | 7.085125 | 8.02769  | 9.182379 | 10.42232 | 11.75696 | 13.19817 | 14.55249 |

Source: El Mouzan MI, Shaffi A, Al Salloum A, Alqurashi MM, Al Herbish A, Al Omer A. Z-score growth reference data for Saudi preschool children. Ann Saudi Med 2017; 37(1): 10-15.

|     |           |          |          |          |          |          |          |          |          |          |
|-----|-----------|----------|----------|----------|----------|----------|----------|----------|----------|----------|
| 80  | 0.395171  | 10.62379 | 0.123325 | 7.247447 | 8.200638 | 9.368778 | 10.62379 | 11.97544 | 13.43597 | 14.80936 |
| 81  | 0.384616  | 10.82378 | 0.122529 | 7.409491 | 8.372742 | 9.553888 | 10.82378 | 12.19256 | 13.67291 | 15.06616 |
| 82  | 0.372369  | 11.02287 | 0.121777 | 7.571552 | 8.54438  | 9.738182 | 11.02287 | 12.40902 | 13.90979 | 15.32382 |
| 83  | 0.358468  | 11.22161 | 0.12107  | 7.73394  | 8.715935 | 9.922128 | 11.22161 | 12.62546 | 14.1474  | 15.58324 |
| 84  | 0.342957  | 11.42046 | 0.120407 | 7.896897 | 8.88771  | 10.1061  | 11.42046 | 12.8424  | 14.38633 | 15.84511 |
| 85  | 0.325884  | 11.61991 | 0.119786 | 8.060739 | 9.060081 | 10.29053 | 11.61991 | 13.06043 | 14.62726 | 16.11021 |
| 86  | 0.307326  | 11.82035 | 0.119205 | 8.225688 | 9.233327 | 10.47577 | 11.82035 | 13.28    | 14.87068 | 16.3791  |
| 87  | 0.287456  | 12.02211 | 0.118665 | 8.391853 | 9.407635 | 10.66207 | 12.02211 | 13.50145 | 15.117   | 16.65218 |
| 88  | 0.266462  | 12.22554 | 0.118163 | 8.559366 | 9.583216 | 10.84973 | 12.22554 | 13.72519 | 15.36662 | 16.9299  |
| 89  | 0.244482  | 12.431   | 0.117699 | 8.728409 | 9.760325 | 11.03906 | 12.431   | 13.95164 | 15.62004 | 17.21278 |
| 90  | 0.221584  | 12.63897 | 0.117272 | 8.899255 | 9.939292 | 11.23046 | 12.63897 | 14.18133 | 15.87784 | 17.50153 |
| 91  | 0.197808  | 12.84983 | 0.116882 | 9.072164 | 10.12041 | 11.42426 | 12.84983 | 14.41469 | 16.14056 | 17.79674 |
| 92  | 0.173183  | 13.06379 | 0.116525 | 9.2473   | 10.30387 | 11.62068 | 13.06379 | 14.652   | 16.40849 | 18.0988  |
| 93  | 0.147742  | 13.28081 | 0.116201 | 9.424645 | 10.48964 | 11.81966 | 13.28081 | 14.89316 | 16.68156 | 18.40765 |
| 94  | 0.121537  | 13.50062 | 0.115907 | 9.604056 | 10.67755 | 12.02101 | 13.50062 | 15.13789 | 16.95945 | 18.72295 |
| 95  | 0.09461   | 13.72304 | 0.11564  | 9.78542  | 10.86747 | 12.22456 | 13.72304 | 15.38593 | 17.24185 | 19.0444  |
| 96  | 6.69E-02  | 13.9482  | 0.115397 | 9.968919 | 11.05956 | 12.43046 | 13.9482  | 15.63746 | 17.52898 | 19.37227 |
| 97  | 3.85E-02  | 14.17669 | 0.115176 | 10.15507 | 11.25437 | 12.63927 | 14.17669 | 15.8931  | 17.82159 | 19.70749 |
| 98  | 9.11E-03  | 14.40929 | 0.114975 | 10.34454 | 11.45257 | 12.85171 | 14.40929 | 16.15373 | 18.12067 | 20.05125 |
| 99  | -2.12E-02 | 14.64664 | 0.114791 | 10.53787 | 11.65473 | 13.06836 | 14.64664 | 16.42006 | 18.42707 | 20.40458 |
| 100 | -0.05237  | 14.88883 | 0.114624 | 10.73514 | 11.86094 | 13.28933 | 14.88883 | 16.6922  | 18.74096 | 20.76774 |
| 101 | -8.44E-02 | 15.13566 | 0.114473 | 10.93618 | 12.07102 | 13.51443 | 15.13566 | 16.96992 | 19.06211 | 21.14054 |
| 102 | -0.11709  | 15.38697 | 0.114338 | 11.14087 | 12.28484 | 13.74351 | 15.38697 | 17.25305 | 19.3903  | 21.5228  |
| 103 | -0.15047  | 15.64265 | 0.114217 | 11.3491  | 12.50232 | 13.97649 | 15.64265 | 17.54145 | 19.72541 | 21.91442 |
| 104 | -0.1844   | 15.90248 | 0.114109 | 11.56069 | 12.72327 | 14.21317 | 15.90248 | 17.83488 | 20.06719 | 22.31516 |
| 105 | -0.21883  | 16.16615 | 0.114014 | 11.77542 | 12.94744 | 14.45327 | 16.16615 | 18.13298 | 20.41524 | 22.72466 |
| 106 | -0.25368  | 16.43321 | 0.113931 | 11.99294 | 13.17446 | 14.69639 | 16.43321 | 18.43524 | 20.76898 | 23.14232 |
| 107 | -0.28891  | 16.70303 | 0.113859 | 12.2128  | 13.40385 | 14.94198 | 16.70303 | 18.74096 | 21.12766 | 23.56736 |

Source: El Mouzan MI, Shaffi A, Al Salloum A, Alqurashi MM, Al Herbish A, Al Omer A. Z-score growth reference data for Saudi preschool children. Ann Saudi Med 2017; 37(1): 10-15.

|     |          |          |          |          |          |          |          |          |          |          |
|-----|----------|----------|----------|----------|----------|----------|----------|----------|----------|----------|
| 108 | -0.32448 | 16.97503 | 0.113796 | 12.43457 | 13.63515 | 15.18953 | 16.97503 | 19.04947 | 21.49052 | 23.99901 |
| 109 | -0.36038 | 17.24877 | 0.113742 | 12.65798 | 13.86802 | 15.43864 | 17.24877 | 19.36026 | 21.85701 | 24.43673 |
| 110 | -0.39663 | 17.52391 | 0.113695 | 12.8828  | 14.10223 | 15.68905 | 17.52391 | 19.67295 | 22.22674 | 24.8802  |
| 111 | -0.43321 | 17.80012 | 0.113654 | 13.10884 | 14.33753 | 15.94046 | 17.80012 | 19.98717 | 22.5993  | 25.32904 |
| 112 | -0.47012 | 18.07711 | 0.113618 | 13.33591 | 14.57373 | 16.19264 | 18.07711 | 20.30256 | 22.97427 | 25.78288 |
| 113 | -0.50735 | 18.35467 | 0.113585 | 13.56388 | 14.81067 | 16.44541 | 18.35467 | 20.61884 | 23.35137 | 26.24145 |
| 114 | -0.54483 | 18.63268 | 0.113554 | 13.79268 | 15.04828 | 16.69868 | 18.63268 | 20.9359  | 23.73042 | 26.70462 |
| 115 | -0.58251 | 18.91106 | 0.113525 | 14.02222 | 15.28649 | 16.95238 | 18.91106 | 21.25359 | 24.11126 | 27.17221 |
| 116 | -0.62029 | 19.18974 | 0.113495 | 14.25242 | 15.52522 | 17.20646 | 19.18974 | 21.57181 | 24.49371 | 27.64406 |
| 117 | -0.65809 | 19.46859 | 0.113466 | 14.48316 | 15.76437 | 17.4608  | 19.46859 | 21.89041 | 24.87757 | 28.11988 |
| 118 | -0.69588 | 19.74756 | 0.113436 | 14.71436 | 16.00388 | 17.71535 | 19.74756 | 22.2093  | 25.26275 | 28.5997  |
| 119 | -0.73366 | 20.02662 | 0.113406 | 14.94601 | 16.24372 | 17.97008 | 20.02662 | 22.52849 | 25.64927 | 29.08363 |
| 120 | -0.77145 | 20.30577 | 0.113377 | 15.17809 | 16.48388 | 18.22498 | 20.30577 | 22.84794 | 26.03715 | 29.57181 |
| 121 | -0.80923 | 20.58498 | 0.113347 | 15.41058 | 16.72433 | 18.48004 | 20.58498 | 23.16765 | 26.42638 | 30.06439 |
| 122 | -0.84701 | 20.86423 | 0.113317 | 15.64346 | 16.96506 | 18.73522 | 20.86423 | 23.48758 | 26.81697 | 30.56148 |

Source: El Mouzan MI, Shaffi A, Al Salloum A, Alqurashi MM, Al Herbish A, Al Omer A. Z-score growth reference data for Saudi preschool children. Ann Saudi Med 2017; 37(1): 10-15.
