# Supplementary material for: Z-score growth reference data for Saudi preschool children
Source: PubMed Central journal article supplement — Ann Saudi Med. 2017 Jan-Feb;37(1):10–5. doi: 10.5144/0256-4947.2017.10 (PMC6148975; doi:10.5144/0256-4947.2017.10), 2017
Supplement: asm-37-1-10-s006.pdf [file asm-37-1-10-s006.pdf]

**Appendix 6.** L, M, and S parameters and z scores for weight for age: girls 0 to 60 months.

| Age (M) | L        | M        | S        | -3       | -2       | -1       | 0        | 1        | 2        | 3        |
|---------|----------|----------|----------|----------|----------|----------|----------|----------|----------|----------|
| 0       | 3.72E-03 | 3.123573 | 0.133379 | 2.12722  | 2.393368 | 2.735474 | 3.123573 | 3.566502 | 4.075488 | 4.584093 |
| 1       | 8.79E-02 | 3.984038 | 0.133994 | 2.691099 | 3.039619 | 3.484266 | 3.984038 | 4.548389 | 5.189169 | 5.821517 |
| 2       | 0.171244 | 4.802435 | 0.134599 | 3.216446 | 3.647976 | 4.194239 | 4.802435 | 5.481974 | 6.244544 | 6.988132 |
| 3       | 0.252813 | 5.553276 | 0.135188 | 3.686965 | 4.199631 | 4.843375 | 5.553276 | 6.338184 | 7.209072 | 8.048717 |
| 4       | 0.331855 | 6.23012  | 0.135758 | 4.099654 | 4.690535 | 5.426381 | 6.23012  | 7.109729 | 8.075168 | 8.99612  |
| 5       | 0.407886 | 6.830537 | 0.13631  | 4.454344 | 5.119748 | 5.941472 | 6.830537 | 7.793915 | 8.840459 | 9.828918 |
| 6       | 0.480369 | 7.356799 | 0.136847 | 4.754117 | 5.489925 | 6.39096  | 7.356799 | 8.393435 | 9.508685 | 10.55239 |
| 7       | 0.548732 | 7.81319  | 0.13737  | 5.00344  | 5.805235 | 6.778892 | 7.81319  | 8.913295 | 10.08616 | 11.17456 |
| 8       | 0.61234  | 8.207185 | 0.13788  | 5.208903 | 6.072231 | 7.112072 | 8.207185 | 9.362132 | 10.58325 | 11.70778 |
| 9       | 0.67041  | 8.547081 | 0.138379 | 5.377694 | 6.298077 | 7.398006 | 8.547081 | 9.749531 | 11.01134 | 12.1654  |
| 10      | 0.722065 | 8.84204  | 0.138866 | 5.517571 | 6.490547 | 7.644921 | 8.84204  | 10.08606 | 11.38285 | 12.56187 |
| 11      | 0.766333 | 9.102267 | 0.139341 | 5.636978 | 6.658159 | 7.861925 | 9.102267 | 10.38349 | 11.71154 | 12.91293 |
| 12      | 0.802168 | 9.337158 | 0.139803 | 5.743876 | 6.808818 | 8.057411 | 9.337158 | 10.65266 | 12.01005 | 13.23308 |
| 13      | 0.829148 | 9.554361 | 0.140252 | 5.84455  | 6.948826 | 8.238164 | 9.554361 | 10.90236 | 12.28858 | 13.53386 |
| 14      | 0.847819 | 9.760572 | 0.140691 | 5.943656 | 7.083271 | 8.409996 | 9.760572 | 11.14028 | 12.55578 | 13.82479 |
| 15      | 0.85877  | 9.961887 | 0.141123 | 6.045207 | 7.216677 | 8.578172 | 9.961887 | 11.37337 | 12.81951 | 14.11446 |
| 16      | 0.862608 | 10.16125 | 0.141551 | 6.151079 | 7.351189 | 8.745215 | 10.16125 | 11.605   | 13.08356 | 14.40702 |
| 17      | 0.859947 | 10.35731 | 0.141977 | 6.260377 | 7.485772 | 8.909939 | 10.35731 | 11.83365 | 13.34617 | 14.70048 |
| 18      | 0.851351 | 10.54754 | 0.142401 | 6.371443 | 7.618538 | 9.070151 | 10.54754 | 12.05642 | 13.60407 | 14.99123 |
| 19      | 0.837314 | 10.73093 | 0.142825 | 6.483503 | 7.7487   | 9.224977 | 10.73093 | 12.27215 | 13.85594 | 15.27779 |
| 20      | 0.81828  | 10.90854 | 0.143248 | 6.596993 | 7.876956 | 9.375323 | 10.90854 | 12.48205 | 14.10312 | 15.56166 |
| 21      | 0.794666 | 11.08027 | 0.143671 | 6.711592 | 8.003145 | 9.521095 | 11.08027 | 12.68596 | 14.34545 | 15.84268 |
| 22      | 0.766888 | 11.24549 | 0.144091 | 6.826586 | 8.126695 | 9.661729 | 11.24549 | 12.88314 | 14.58204 | 16.11991 |
| 23      | 0.735344 | 11.40247 | 0.144509 | 6.940576 | 8.246242 | 9.795746 | 11.40247 | 13.07159 | 14.81062 | 16.39082 |

Source: El Mouzan MI, Shaffi A, Al Salloum A, Alqurashi MM, Al Herbish A, Al Omer A. Z-score growth reference data for Saudi preschool children. Ann Saudi Med 2017; 37(1): 10-15.

|    |           |          |          |          |          |          |          |          |          |          |
|----|-----------|----------|----------|----------|----------|----------|----------|----------|----------|----------|
| 24 | 0.70037   | 11.5512  | 0.144923 | 7.053193 | 8.361644 | 9.923108 | 11.5512  | 13.25124 | 15.03109 | 16.65534 |
| 25 | 0.662224  | 11.69298 | 0.145333 | 7.164929 | 8.473746 | 10.04493 | 11.69298 | 13.42356 | 15.24511 | 16.91539 |
| 26 | 0.621116  | 11.83062 | 0.145738 | 7.277253 | 8.584515 | 10.16365 | 11.83062 | 13.59178 | 15.45636 | 17.17513 |
| 27 | 0.577263  | 11.96678 | 0.146136 | 7.39151  | 8.695767 | 10.28152 | 11.96678 | 13.75891 | 15.6683  | 17.43852 |
| 28 | 0.530971  | 12.10313 | 0.146528 | 7.508375 | 8.808573 | 10.39996 | 12.10313 | 13.92685 | 15.8831  | 17.70811 |
| 29 | 0.482562  | 12.24045 | 0.146914 | 7.627976 | 8.923351 | 10.51961 | 12.24045 | 14.09649 | 16.10179 | 17.9851  |
| 30 | 0.432357  | 12.37949 | 0.147292 | 7.750428 | 9.040484 | 10.64108 | 12.37949 | 14.26865 | 16.32531 | 18.27068 |
| 31 | 0.380687  | 12.52021 | 0.147663 | 7.875368 | 9.159791 | 10.7643  | 12.52021 | 14.4433  | 16.55362 | 18.56488 |
| 32 | 0.327882  | 12.66183 | 0.148028 | 8.00196  | 9.280525 | 10.88856 | 12.66183 | 14.61951 | 16.78564 | 18.8666  |
| 33 | 0.274243  | 12.80327 | 0.148387 | 8.129221 | 9.401744 | 11.01289 | 12.80327 | 14.79601 | 17.0199  | 19.17425 |
| 34 | 0.220035  | 12.94399 | 0.14874  | 8.25656  | 9.522924 | 11.13681 | 12.94399 | 14.97215 | 17.25562 | 19.48707 |
| 35 | 0.165541  | 13.08375 | 0.149087 | 8.383545 | 9.643731 | 11.26004 | 13.08375 | 15.14759 | 17.49238 | 19.80459 |
| 36 | 0.11108   | 13.22153 | 0.149428 | 8.509268 | 9.763288 | 11.3817  | 13.22153 | 15.32113 | 17.72866 | 20.1251  |
| 37 | 5.69E-02  | 13.35636 | 0.149763 | 8.632875 | 9.88074  | 11.5009  | 13.35636 | 15.4916  | 17.96303 | 20.44694 |
| 38 | 3.15E-03  | 13.48793 | 0.150092 | 8.754016 | 9.995767 | 11.61735 | 13.48793 | 15.6586  | 18.19499 | 20.76961 |
| 39 | -5.00E-02 | 13.61598 | 0.150417 | 8.87235  | 10.10806 | 11.73079 | 13.61598 | 15.8218  | 18.42409 | 21.0926  |
| 40 | -0.10238  | 13.74038 | 0.150738 | 8.987634 | 10.21743 | 11.84108 | 13.74038 | 15.98105 | 18.65006 | 21.41558 |
| 41 | -0.15381  | 13.86164 | 0.151057 | 9.100037 | 10.32415 | 11.9486  | 13.86164 | 16.13688 | 18.87341 | 21.73908 |
| 42 | -0.20412  | 13.98091 | 0.151373 | 9.210198 | 10.42898 | 12.05434 | 13.98091 | 16.29061 | 19.09554 | 22.0646  |
| 43 | -0.25315  | 14.09932 | 0.151688 | 9.318754 | 10.53271 | 12.15923 | 14.09932 | 16.44348 | 19.3178  | 22.39356 |
| 44 | -0.30077  | 14.21816 | 0.151999 | 9.426507 | 10.63626 | 12.26438 | 14.21816 | 16.59698 | 19.54178 | 22.72768 |
| 45 | -0.3469   | 14.33864 | 0.152308 | 9.53422  | 10.74049 | 12.37081 | 14.33864 | 16.75247 | 19.769   | 23.06863 |
| 46 | -0.39144  | 14.46171 | 0.152614 | 9.642512 | 10.8461  | 12.47933 | 14.46171 | 16.91105 | 20.00062 | 23.41764 |
| 47 | -0.43431  | 14.58795 | 0.152916 | 9.751762 | 10.95351 | 12.59044 | 14.58795 | 17.07336 | 20.23729 | 23.77529 |
| 48 | -0.47545  | 14.71768 | 0.153216 | 9.862179 | 11.06293 | 12.7044  | 14.71768 | 17.23974 | 20.47929 | 24.14178 |
| 49 | -0.51489  | 14.85108 | 0.153513 | 9.973926 | 11.17453 | 12.82137 | 14.85108 | 17.41042 | 20.72689 | 24.51739 |

Source: El Mouzan MI, Shaffi A, Al Salloum A, Alqurashi MM, Al Herbish A, Al Omer A. Z-score growth reference data for Saudi preschool children. Ann Saudi Med 2017; 37(1): 10-15.

|    |          |          |          |          |          |          |          |          |          |          |
|----|----------|----------|----------|----------|----------|----------|----------|----------|----------|----------|
| 50 | -0.55268 | 14.9882  | 0.153808 | 10.08709 | 11.28834 | 12.94137 | 14.9882  | 17.58547 | 20.98016 | 24.90221 |
| 51 | -0.5889  | 15.12877 | 0.154102 | 10.20157 | 11.40421 | 13.06419 | 15.12877 | 17.7646  | 21.23879 | 25.29599 |
| 52 | -0.62372 | 15.27204 | 0.154395 | 10.31698 | 11.52163 | 13.18919 | 15.27204 | 17.94696 | 21.50188 | 25.6979  |
| 53 | -0.65726 | 15.417   | 0.154688 | 10.43275 | 11.63988 | 13.31551 | 15.417   | 18.1314  | 21.76816 | 26.1067  |
| 54 | -0.68971 | 15.56323 | 0.15498  | 10.54873 | 11.75873 | 13.4428  | 15.56323 | 18.31747 | 22.03722 | 26.52225 |
| 55 | -0.72125 | 15.71031 | 0.155273 | 10.66475 | 11.87793 | 13.57072 | 15.71031 | 18.5047  | 22.3087  | 26.94461 |
| 56 | -0.75209 | 15.85759 | 0.155565 | 10.78054 | 11.99707 | 13.69873 | 15.85759 | 18.6924  | 22.582   | 27.37373 |
| 57 | -0.78247 | 16.00505 | 0.155859 | 10.89624 | 12.11622 | 13.82684 | 16.00505 | 18.88059 | 22.85746 | 27.81084 |
| 58 | -0.81257 | 16.15261 | 0.156153 | 11.01193 | 12.23542 | 13.95501 | 16.15261 | 19.06925 | 23.13529 | 28.25704 |
| 59 | -0.84253 | 16.3     | 0.156447 | 11.12753 | 12.35451 | 14.08302 | 16.3     | 19.25808 | 23.41539 | 28.71302 |
| 60 | -0.87244 | 16.44724 | 0.156742 | 11.24312 | 12.47355 | 14.21092 | 16.44724 | 19.44714 | 23.698   | 29.17983 |

Source: El Mouzan MI, Shaffi A, Al Salloum A, Alqurashi MM, Al Herbish A, Al Omer A. Z-score growth reference data for Saudi preschool children. Ann Saudi Med 2017; 37(1): 10-15.
