# Supplementary material for: Z-score growth reference data for Saudi preschool children
Source: PubMed Central journal article supplement — Ann Saudi Med. 2017 Jan-Feb;37(1):10–5. doi: 10.5144/0256-4947.2017.10 (PMC6148975; doi:10.5144/0256-4947.2017.10), 2017
Supplement: asm-37-1-10-s007.pdf [file asm-37-1-10-s007.pdf]

**Appendix 7. L, M, and S parameters and z scores for length/height for age: girls 0 to 60 months.**

| Age (M) | L          | M        | S      | S         | -3       | -2       | -1       | 0        | 1        | 2        | 3        |
|---------|------------|----------|--------|-----------|----------|----------|----------|----------|----------|----------|----------|
| 0       | -1.745846  | 50.04858 | 0.0511 | 5.11E-02  | 44.14589 | 45.63882 | 47.67192 | 50.04858 | 52.78172 | 55.86776 | 58.78751 |
| 1       | -2.016772  | 53.28392 | 0.0518 | 5.18E-02  | 47.01725 | 48.58324 | 50.73569 | 53.28392 | 56.26199 | 59.69349 | 63.01586 |
| 2       | -2.227232  | 56.40067 | 0.0525 | 5.25E-02  | 49.76727 | 51.40893 | 53.68203 | 56.40067 | 59.62049 | 63.39515 | 67.12474 |
| 3       | -2.335904  | 59.27916 | 0.0532 | 5.32E-02  | 52.27338 | 53.99718 | 56.39444 | 59.27916 | 62.72342 | 66.80448 | 70.88887 |
| 4       | -2.304683  | 61.87717 | 0.0539 | 5.39E-02  | 54.47893 | 56.29842 | 58.82974 | 61.87717 | 65.51752 | 69.83318 | 74.1545  |
| 5       | -2.090466  | 64.17665 | 0.0545 | 5.45E-02  | 56.34077 | 58.28088 | 60.96655 | 64.17665 | 67.97411 | 72.41723 | 76.79521 |
| 6       | -1.606684  | 66.16769 | 0.0550 | 0.0550314 | 57.79061 | 59.90274 | 62.78647 | 66.16769 | 70.06867 | 74.48819 | 78.68284 |
| 7       | -0.8757042 | 67.86938 | 0.0555 | 5.55E-02  | 58.81129 | 61.1666  | 64.30534 | 67.86938 | 71.82281 | 76.09592 | 79.95139 |
| 8       | -5.83E-02  | 69.35647 | 0.0560 | 5.60E-02  | 59.50393 | 62.16744 | 65.60487 | 69.35647 | 73.33588 | 77.43126 | 80.95215 |
| 9       | 0.7000358  | 70.71087 | 0.0564 | 5.64E-02  | 60.00731 | 63.02203 | 66.77649 | 70.71087 | 74.71205 | 78.65928 | 81.92482 |
| 10      | 1.315136   | 72.00359 | 0.0568 | 5.68E-02  | 60.46304 | 63.83801 | 67.89918 | 72.00359 | 76.03551 | 79.88654 | 82.98592 |
| 11      | 1.746009   | 73.27195 | 0.0571 | 0.0571117 | 60.99327 | 64.69062 | 69.01746 | 73.27195 | 77.34958 | 81.16055 | 84.17385 |
| 12      | 1.977328   | 74.50918 | 0.0574 | 0.0573815 | 61.68032 | 65.60951 | 70.13169 | 74.50918 | 78.6486  | 82.47325 | 85.47007 |
| 13      | 2.024      | 75.68713 | 0.0576 | 5.76E-02  | 62.54268 | 66.58375 | 71.21727 | 75.68713 | 79.90168 | 83.78635 | 86.82443 |
| 14      | 1.922223   | 76.7937  | 0.0577 | 5.77E-02  | 63.54978 | 67.59163 | 72.2599  | 76.7937  | 81.09306 | 85.07501 | 88.201   |
| 15      | 1.717003   | 77.82471 | 0.0579 | 5.79E-02  | 64.63716 | 68.60298 | 73.24986 | 77.82471 | 82.21432 | 86.32094 | 89.57066 |
| 16      | 1.451676   | 78.78719 | 0.0579 | 0.0579262 | 65.74325 | 69.59458 | 74.18732 | 78.78719 | 83.26875 | 87.51791 | 90.91707 |
| 17      | 1.181819   | 79.6981  | 0.0580 | 5.80E-02  | 66.80739 | 70.54624 | 75.07993 | 79.6981  | 84.2681  | 88.66229 | 92.21857 |
| 18      | 0.9561402  | 80.56888 | 0.0580 | 5.80E-02  | 67.78516 | 71.44038 | 75.93119 | 80.56888 | 85.21831 | 89.74306 | 93.44253 |
| 19      | 0.7789729  | 81.41542 | 0.0579 | 5.79E-02  | 68.69002 | 72.28935 | 76.75502 | 81.41542 | 86.13557 | 90.77369 | 94.59755 |
| 20      | 0.6406384  | 82.25525 | 0.0579 | 5.79E-02  | 69.54998 | 73.11417 | 77.56885 | 82.25525 | 87.03964 | 91.77702 | 95.70895 |
| 21      | 0.5396562  | 83.09435 | 0.0578 | 5.78E-02  | 70.37338 | 73.92108 | 78.37824 | 83.09435 | 87.937   | 92.75922 | 96.78158 |
| 22      | 0.4822548  | 83.92944 | 0.0578 | 5.78E-02  | 71.15228 | 74.70401 | 79.1791  | 83.92944 | 88.8232  | 93.71201 | 97.80163 |
| 23      | 0.4779048  | 84.74863 | 0.0577 | 5.77E-02  | 71.86714 | 75.44714 | 79.95865 | 84.74863 | 89.68429 | 94.61597 | 98.74224 |
| 24      | 0.5295754  | 85.54453 | 0.0576 | 5.76E-02  | 72.5072  | 76.14143 | 80.70918 | 85.54453 | 90.51199 | 95.46083 | 99.59056 |
| 25      | 0.6317477  | 86.31721 | 0.0575 | 5.75E-02  | 73.07516 | 76.78854 | 81.43122 | 86.31721 | 91.30725 | 96.25011 | 100.354  |
| 26      | 0.7709967  | 87.07016 | 0.0574 | 5.74E-02  | 73.58395 | 77.39714 | 82.12962 | 87.07016 | 92.07578 | 96.99607 | 101.0538 |
| 27      | 0.9191141  | 87.80671 | 0.0573 | 5.73E-02  | 74.06389 | 77.98457 | 82.81133 | 87.80671 | 92.8252  | 97.7187  | 101.7264 |
| 28      | 1.043498   | 88.52699 | 0.0572 | 5.72E-02  | 74.55208 | 78.56963 | 83.48122 | 88.52699 | 93.56026 | 98.43575 | 102.4062 |
| 29      | 1.137216   | 89.22626 | 0.0571 | 0.0571384 | 75.05536 | 79.15318 | 84.13601 | 89.22626 | 94.27695 | 99.14529 | 103.0934 |
| 30      | 1.200525   | 89.90739 | 0.0570 | 5.70E-02  | 75.5785  | 79.73856 | 84.77845 | 89.90739 | 94.97829 | 99.8501  | 103.7902 |
| 31      | 1.232725   | 90.57722 | 0.0569 | 5.69E-02  | 76.13013 | 80.333   | 85.41519 | 90.57722 | 95.67162 | 100.558  | 104.5044 |
| 32      | 1.231731   | 91.23624 | 0.0568 | 5.68E-02  | 76.71461 | 80.93875 | 86.04714 | 91.23624 | 96.35778 | 101.2705 | 105.2385 |
| 33      | 1.207087   | 91.88199 | 0.0567 | 5.67E-02  | 77.3185  | 81.54807 | 86.6706  | 91.88199 | 97.03283 | 101.9801 | 105.9802 |
| 34      | 1.175621   | 92.5139  | 0.0565 | 0.0565748 | 77.92054 | 82.15028 | 87.28256 | 92.5139  | 97.69376 | 102.677  | 106.7119 |

Source: El Mouzan MI, Shaffi A, Al Salloum A, Alqurashi MM, Al Herbish A, Al Omer A. Z-score growth reference data for Saudi preschool children. Ann Saudi Med 2017; 37(1): 10-15.

|    |           |          |        |           |          |          |          |          |          |          |          |
|----|-----------|----------|--------|-----------|----------|----------|----------|----------|----------|----------|----------|
| 35 | 1.152471  | 93.13397 | 0.0565 | 5.65E-02  | 78.50358 | 82.73782 | 87.88255 | 93.13397 | 98.34061 | 103.3557 | 107.4204 |
| 36 | 1.146422  | 93.74374 | 0.0563 | 5.63E-02  | 79.05801 | 83.30656 | 88.4706  | 93.74374 | 98.97377 | 104.0131 | 108.0985 |
| 37 | 1.15155   | 94.34836 | 0.0562 | 5.62E-02  | 79.59532 | 83.86461 | 89.05243 | 94.34836 | 99.59959 | 104.6581 | 108.7582 |
| 38 | 1.149141  | 94.95914 | 0.0561 | 5.61E-02  | 80.148   | 84.43336 | 89.64155 | 94.95914 | 100.2327 | 105.3133 | 109.4319 |
| 39 | 1.125386  | 95.58689 | 0.0590 | 5.59E-02  | 80.7424  | 85.03104 | 90.25035 | 95.58689 | 100.8863 | 105.9982 | 110.1465 |
| 40 | 1.073965  | 96.23548 | 0.0580 | 5.58E-02  | 81.38943 | 85.665   | 90.88354 | 96.23548 | 101.5655 | 106.7206 | 110.9133 |
| 41 | 0.9971901 | 96.90764 | 0.0570 | 5.57E-02  | 82.08771 | 86.33602 | 91.54332 | 96.90764 | 102.2728 | 107.4825 | 111.7339 |
| 42 | 0.9055942 | 97.59653 | 0.0555 | 0.055526  | 82.81788 | 87.03145 | 92.22168 | 97.59653 | 102.9995 | 108.2709 | 112.5902 |
| 43 | 0.8048014 | 98.2886  | 0.0554 | 5.54E-02  | 83.56142 | 87.73584 | 92.90505 | 98.2886  | 103.7304 | 109.0676 | 113.4608 |
| 44 | 0.697173  | 98.96844 | 0.0552 | 5.52E-02  | 84.30215 | 88.434   | 93.57855 | 98.96844 | 104.4487 | 109.8542 | 114.3254 |
| 45 | 0.5933816 | 99.62492 | 0.0551 | 5.51E-02  | 85.0184  | 89.10981 | 94.23012 | 99.62492 | 105.1412 | 110.612  | 115.1592 |
| 46 | 0.5052009 | 100.2525 | 0.0549 | 5.49E-02  | 85.69275 | 89.75163 | 94.85268 | 100.2525 | 105.8002 | 111.3278 | 115.9413 |
| 47 | 0.443408  | 100.8477 | 0.0547 | 5.47E-02  | 86.31111 | 90.35036 | 95.44128 | 100.8477 | 106.4205 | 111.9911 | 116.654  |
| 48 | 0.4217732 | 101.4043 | 0.0546 | 5.46E-02  | 86.85378 | 90.89259 | 95.98768 | 101.4043 | 106.9935 | 112.5866 | 117.2728 |
| 49 | 0.4432607 | 101.9238 | 0.0544 | 5.44E-02  | 87.31888 | 91.37789 | 96.49284 | 101.9238 | 107.5209 | 113.1148 | 117.7965 |
| 50 | 0.4931585 | 102.415  | 0.0542 | 5.42E-02  | 87.72821 | 91.82133 | 96.96669 | 102.415  | 108.0144 | 113.5953 | 118.2547 |
| 51 | 0.5661118 | 102.887  | 0.0541 | 5.41E-02  | 88.09393 | 92.23329 | 97.41834 | 102.887  | 108.4849 | 114.0424 | 118.6661 |
| 52 | 0.6610284 | 103.344  | 0.0539 | 5.39E-02  | 88.41939 | 92.61751 | 97.85175 | 103.344  | 108.9371 | 114.4621 | 119.0385 |
| 53 | 0.7768053 | 103.791  | 0.0538 | 5.38E-02  | 88.70864 | 92.97857 | 98.27177 | 103.791  | 109.3766 | 114.8612 | 119.3803 |
| 54 | 0.917238  | 104.2271 | 0.0537 | 5.37E-02  | 88.95463 | 93.31274 | 98.67681 | 104.2271 | 109.8019 | 115.237  | 119.6876 |
| 55 | 1.086038  | 104.6526 | 0.0535 | 0.0535479 | 89.15066 | 93.61736 | 99.0667  | 104.6526 | 110.213  | 115.5884 | 119.9587 |
| 56 | 1.285361  | 105.0711 | 0.0534 | 5.34E-02  | 89.29297 | 93.89291 | 99.44427 | 105.0711 | 110.6132 | 115.9191 | 120.1976 |
| 57 | 1.514394  | 105.4809 | 0.0533 | 0.0533279 | 89.37538 | 94.13648 | 99.80785 | 105.4809 | 111.0011 | 116.2287 | 120.4061 |
| 58 | 1.767735  | 105.8878 | 0.0532 | 5.32E-02  | 89.40327 | 94.35474 | 100.1636 | 105.8878 | 111.3837 | 116.5273 | 120.5984 |
| 59 | 2.033222  | 106.3003 | 0.0531 | 5.31E-02  | 89.39452 | 94.56169 | 100.5215 | 106.3003 | 111.7714 | 116.8306 | 120.7968 |
| 60 | 2.295717  | 106.72   | 0.0530 | 0.0530383 | 89.36958 | 94.76883 | 100.8856 | 106.72   | 112.1678 | 117.1476 | 121.0164 |

Source: El Mouzan MI, Shaffi A, Al Salloum A, Alqurashi MM, Al Herbish A, Al Omer A. Z-score growth reference data for Saudi preschool children. Ann Saudi Med 2017; 37(1): 10-15.
