# Supplementary material for: Z-score growth reference data for Saudi preschool children
Source: PubMed Central journal article supplement — Ann Saudi Med. 2017 Jan-Feb;37(1):10–5. doi: 10.5144/0256-4947.2017.10 (PMC6148975; doi:10.5144/0256-4947.2017.10), 2017
Supplement: asm-37-1-10-s008.pdf [file asm-37-1-10-s008.pdf]

**Appendix 8.** L, M, and S parameters and z scores for head circumference for age: girls 0 to 60 months.

| Age (M) | L         | M        | S      | -3       | -2       | -1       | 0        | 1        | 2        | 3        |
|---------|-----------|----------|--------|----------|----------|----------|----------|----------|----------|----------|
| 0       | -2.98265  | 34.81456 | 0.0474 | 31.04717 | 32.02984 | 33.31147 | 34.81456 | 36.63018 | 38.90985 | 41.48556 |
| 1       | -2.83494  | 36.09895 | 0.0471 | 32.1899  | 33.21562 | 34.5472  | 36.09895 | 37.95734 | 40.2627  | 42.82493 |
| 2       | -2.68381  | 37.35358 | 0.0467 | 33.30553 | 34.37422 | 35.75496 | 37.35358 | 39.25169 | 41.5785  | 44.12403 |
| 3       | -2.52669  | 38.55286 | 0.0463 | 34.37072 | 35.4818  | 36.91016 | 38.55286 | 40.48629 | 42.82844 | 45.35165 |
| 4       | -2.3623   | 39.67725 | 0.0459 | 35.36772 | 36.52021 | 37.99404 | 39.67725 | 41.64067 | 43.99101 | 46.48518 |
| 5       | -2.19058  | 40.71267 | 0.0455 | 36.2839  | 37.47643 | 38.99306 | 40.71267 | 42.70023 | 45.05125 | 47.50962 |
| 6       | -2.01212  | 41.65142 | 0.0451 | 37.11245 | 38.3434  | 39.89985 | 41.65142 | 43.65715 | 46.00159 | 48.4181  |
| 7       | -1.82796  | 42.49076 | 0.0447 | 37.85109 | 39.11863 | 40.71172 | 42.49076 | 44.50881 | 46.83998 | 49.20961 |
| 8       | -1.63905  | 43.23235 | 0.0443 | 38.50148 | 39.80374 | 41.43024 | 43.23235 | 45.25725 | 47.56928 | 49.88813 |
| 9       | -1.44718  | 43.88116 | 0.0439 | 39.06844 | 40.40347 | 42.06019 | 43.88116 | 45.90799 | 48.19606 | 50.46162 |
| 10      | -1.2549   | 44.44473 | 0.0436 | 39.5593  | 40.92503 | 42.6088  | 44.44473 | 46.46926 | 48.72978 | 50.94105 |
| 11      | -1.06452  | 44.93179 | 0.0432 | 39.98243 | 41.37674 | 43.08445 | 44.93179 | 46.95049 | 49.18097 | 51.3382  |
| 12      | -0.87816  | 45.35104 | 0.0428 | 40.34615 | 41.76683 | 43.4955  | 45.35104 | 47.36103 | 49.55996 | 51.66432 |
| 13      | -0.69783  | 45.71075 | 0.0424 | 40.65839 | 42.10317 | 43.84989 | 45.71075 | 47.70978 | 49.87646 | 51.9299  |
| 14      | -0.52453  | 46.01849 | 0.0420 | 40.92619 | 42.3928  | 44.15484 | 46.01849 | 48.00478 | 50.13905 | 52.14385 |
| 15      | -0.35914  | 46.28131 | 0.0416 | 41.15609 | 42.64229 | 44.41709 | 46.28131 | 48.25351 | 50.3557  | 52.31435 |
| 16      | -0.20246  | 46.50579 | 0.0413 | 41.35416 | 42.85775 | 44.6429  | 46.50579 | 48.46294 | 50.53372 | 52.4489  |
| 17      | -5.51E-02 | 46.69772 | 0.0409 | 41.52573 | 43.04453 | 44.83781 | 46.69772 | 48.63921 | 50.67956 | 52.55402 |
| 18      | 8.23E-02  | 46.86248 | 0.0406 | 41.6757  | 43.20758 | 45.00693 | 46.86248 | 48.78801 | 50.79915 | 52.63571 |
| 19      | 0.209138  | 47.0049  | 0.0402 | 41.80851 | 43.35136 | 45.15484 | 47.0049  | 48.91441 | 50.89778 | 52.69931 |
| 20      | 0.325052  | 47.1289  | 0.0399 | 41.92767 | 43.47943 | 45.28527 | 47.1289  | 49.02252 | 50.97967 | 52.74896 |
| 21      | 0.43      | 47.23758 | 0.0395 | 42.03593 | 43.59461 | 45.40118 | 47.23758 | 49.11559 | 51.0481  | 52.78783 |
| 22      | 0.524061  | 47.33335 | 0.0392 | 42.13539 | 43.69907 | 45.50484 | 47.33335 | 49.19611 | 51.10553 | 52.81823 |
| 23      | 0.607376  | 47.41826 | 0.0389 | 42.22776 | 43.7946  | 45.59818 | 47.41826 | 49.2662  | 51.15406 | 52.84211 |

Source: El Mouzan MI, Shaffi A, Al Salloum A, Alqurashi MM, Al Herbish A, Al Omer A. Z-score growth reference data for Saudi preschool children. Ann Saudi Med 2017; 37(1): 10-15.

|    |          |          |        |          |          |          |          |          |          |          |
|----|----------|----------|--------|----------|----------|----------|----------|----------|----------|----------|
| 24 | 0.679819 | 47.49464 | 0.0386 | 42.31507 | 43.8833  | 45.68341 | 47.49464 | 49.32827 | 51.19615 | 52.86185 |
| 25 | 0.7411   | 47.56498 | 0.0383 | 42.3995  | 43.96742 | 45.76289 | 47.56498 | 49.38493 | 51.23444 | 52.88011 |
| 26 | 0.791095 | 47.63173 | 0.0380 | 42.48315 | 44.04915 | 45.83894 | 47.63173 | 49.43872 | 51.27153 | 52.89943 |
| 27 | 0.829902 | 47.69701 | 0.0377 | 42.56778 | 44.13038 | 45.91359 | 47.69701 | 49.49185 | 51.30962 | 52.92197 |
| 28 | 0.857865 | 47.7625  | 0.0375 | 42.65466 | 44.21253 | 45.98841 | 47.7625  | 49.54602 | 51.35041 | 52.94932 |
| 29 | 0.875564 | 47.8294  | 0.0375 | 42.74458 | 44.29656 | 46.0645  | 47.8294  | 49.60244 | 51.39504 | 52.98251 |
| 30 | 0.883736 | 47.8986  | 0.0369 | 42.83802 | 44.38314 | 46.14268 | 47.8986  | 49.66204 | 51.44434 | 53.02223 |
| 31 | 0.883204 | 47.9707  | 0.0367 | 42.93517 | 44.47266 | 46.2235  | 47.9707  | 49.72538 | 51.49881 | 53.06884 |
| 32 | 0.874863 | 48.04581 | 0.0365 | 43.0358  | 44.56506 | 46.30699 | 48.04581 | 49.79255 | 51.55844 | 53.12218 |
| 33 | 0.859671 | 48.12375 | 0.0362 | 43.1394  | 44.66    | 46.39296 | 48.12375 | 49.86332 | 51.62287 | 53.18172 |
| 34 | 0.838675 | 48.20408 | 0.0361 | 43.2453  | 44.75694 | 46.48095 | 48.20408 | 49.9372  | 51.69147 | 53.24667 |
| 35 | 0.813025 | 48.28625 | 0.0359 | 43.3527  | 44.85527 | 46.57042 | 48.28625 | 50.01356 | 51.76346 | 53.31603 |
| 36 | 0.783993 | 48.36948 | 0.0357 | 43.46063 | 44.95413 | 46.6606  | 48.36948 | 50.09151 | 51.83777 | 53.38851 |
| 37 | 0.752983 | 48.45285 | 0.0355 | 43.568   | 45.05257 | 46.75059 | 48.45285 | 50.17001 | 51.91315 | 53.46261 |
| 38 | 0.721516 | 48.5352  | 0.0353 | 43.67353 | 45.14943 | 46.83929 | 48.5352  | 50.24777 | 51.98808 | 53.53653 |
| 39 | 0.691213 | 48.61518 | 0.0351 | 43.77576 | 45.24337 | 46.9254  | 48.61518 | 50.3233  | 52.06081 | 53.60824 |
| 40 | 0.663087 | 48.69201 | 0.0350 | 43.87386 | 45.33363 | 47.00817 | 48.69201 | 50.39571 | 52.13033 | 53.6765  |
| 41 | 0.637269 | 48.76581 | 0.0348 | 43.96798 | 45.42034 | 47.08773 | 48.76581 | 50.4651  | 52.19669 | 53.74136 |
| 42 | 0.613841 | 48.83694 | 0.0347 | 44.05853 | 45.5039  | 47.16446 | 48.83694 | 50.53184 | 52.26023 | 53.80316 |
| 43 | 0.592843 | 48.90564 | 0.0345 | 44.14577 | 45.58456 | 47.23861 | 48.90564 | 50.59613 | 52.32118 | 53.86208 |
| 44 | 0.574156 | 48.9722  | 0.0344 | 44.23008 | 45.66267 | 47.31048 | 48.9722  | 50.65828 | 52.37983 | 53.91843 |
| 45 | 0.557457 | 49.03707 | 0.0342 | 44.312   | 45.7387  | 47.38054 | 49.03707 | 50.71875 | 52.43667 | 53.97276 |
| 46 | 0.542454 | 49.10055 | 0.0341 | 44.39192 | 45.81302 | 47.44909 | 49.10055 | 50.77782 | 52.49201 | 54.02542 |
| 47 | 0.528927 | 49.16293 | 0.0390 | 44.47023 | 45.88596 | 47.51645 | 49.16293 | 50.8358  | 52.54616 | 54.07672 |
| 48 | 0.516699 | 49.22464 | 0.0380 | 44.54742 | 45.95798 | 47.58307 | 49.22464 | 50.89311 | 52.59957 | 54.12714 |
| 49 | 0.505596 | 49.28618 | 0.0370 | 44.62403 | 46.02962 | 47.64943 | 49.28618 | 50.95026 | 52.65275 | 54.17722 |

Source: El Mouzan MI, Shaffi A, Al Salloum A, Alqurashi MM, Al Herbish A, Al Omer A. Z-score growth reference data for Saudi preschool children. Ann Saudi Med 2017; 37(1): 10-15.

|    |          |          |        |          |          |          |          |          |          |          |
|----|----------|----------|--------|----------|----------|----------|----------|----------|----------|----------|
| 50 | 0.495626 | 49.3475  | 0.0350 | 44.70009 | 46.10086 | 47.71552 | 49.3475  | 51.00716 | 52.70559 | 54.22681 |
| 51 | 0.486874 | 49.40824 | 0.0334 | 44.77531 | 46.17141 | 47.78101 | 49.40824 | 51.06343 | 52.75769 | 54.27549 |
| 52 | 0.479113 | 49.4683  | 0.0333 | 44.84967 | 46.2412  | 47.84581 | 49.4683  | 51.11899 | 52.80894 | 54.32318 |
| 53 | 0.472116 | 49.52753 | 0.0331 | 44.92309 | 46.31013 | 47.90979 | 49.52753 | 51.17366 | 52.85922 | 54.36975 |
| 54 | 0.465735 | 49.58562 | 0.0330 | 44.99537 | 46.37795 | 47.97267 | 49.58562 | 51.2271  | 52.90815 | 54.41484 |
| 55 | 0.459882 | 49.64214 | 0.0329 | 45.06622 | 46.44432 | 48.03405 | 49.64214 | 51.27888 | 52.95527 | 54.45796 |
| 56 | 0.454344 | 49.69726 | 0.0327 | 45.13585 | 46.50943 | 48.09411 | 49.69726 | 51.32914 | 53.00074 | 54.4993  |
| 57 | 0.448966 | 49.75153 | 0.0326 | 45.20476 | 46.57381 | 48.15338 | 49.75153 | 51.37848 | 53.0452  | 54.53954 |
| 58 | 0.4437   | 49.80531 | 0.0325 | 45.27329 | 46.63777 | 48.21221 | 49.80531 | 51.42728 | 53.08906 | 54.57911 |
| 59 | 0.438544 | 49.85874 | 0.0323 | 45.34155 | 46.70144 | 48.27072 | 49.85874 | 51.47568 | 53.13246 | 54.61816 |
| 60 | 0.433541 | 49.91208 | 0.0322 | 45.40974 | 46.76506 | 48.32917 | 49.91208 | 51.52396 | 53.17569 | 54.65699 |

Source: El Mouzan MI, Shaffi A, Al Salloum A, Alqurashi MM, Al Herbish A, Al Omer A. Z-score growth reference data for Saudi preschool children. Ann Saudi Med 2017; 37(1): 10-15.
