# Supplementary material for: Z-score growth reference data for Saudi preschool children
Source: PubMed Central journal article supplement — Ann Saudi Med. 2017 Jan-Feb;37(1):10–5. doi: 10.5144/0256-4947.2017.10 (PMC6148975; doi:10.5144/0256-4947.2017.10), 2017
Supplement: asm-37-1-10-s011.pdf [file asm-37-1-10-s011.pdf]

**Appendix 11.** Comparison of WHO and Saudi z-score reference for weight for age for boys.

| Age (months) | WHO (-2SD) | KSA (-2SD) | WHO 0 SD | KSA 0 SD | WHO (+2SD) | KSA (+2SD) |
|--------------|------------|------------|----------|----------|------------|------------|
| 0            | 2.5        | 2.4683     | 3.3      | 3.1555   | 4.4        | 4.4179     |
| 1            | 3.4        | 3.1591     | 4.5      | 4.0585   | 5.8        | 5.6734     |
| 2            | 4.3        | 3.8101     | 5.6      | 4.919    | 7.1        | 6.8651     |
| 3            | 5          | 4.3979     | 6.4      | 5.7058   | 8          | 7.9497     |
| 4            | 5.6        | 4.9152     | 7        | 6.408    | 8.7        | 8.9121     |
| 5            | 6          | 5.3639     | 7.5      | 7.0261   | 9.3        | 9.7533     |
| 6            | 6.4        | 5.7485     | 7.9      | 7.5645   | 9.8        | 10.48      |
| 7            | 6.7        | 6.076      | 8.3      | 8.0306   | 10.3       | 11.103     |
| 8            | 6.9        | 6.3557     | 8.6      | 8.4352   | 10.7       | 11.637     |
| 9            | 7.1        | 6.5974     | 8.9      | 8.7897   | 11         | 12.101     |
| 10           | 7.4        | 6.809      | 9.2      | 9.1034   | 11.4       | 12.505     |
| 11           | 7.6        | 6.9962     | 9.4      | 9.3831   | 11.7       | 12.861     |
| 12           | 7.7        | 7.1635     | 9.6      | 9.6342   | 12         | 13.174     |
| 13           | 7.9        | 7.3144     | 9.9      | 9.8611   | 12.3       | 13.45      |
| 14           | 8.1        | 7.4534     | 10.1     | 10.069   | 12.6       | 13.698     |
| 15           | 8.3        | 7.5844     | 10.3     | 10.263   | 12.8       | 13.926     |
| 16           | 8.4        | 7.7106     | 10.5     | 10.446   | 13.1       | 14.14      |
| 17           | 8.6        | 7.8339     | 10.7     | 10.621   | 13.4       | 14.344     |
| 18           | 8.8        | 7.9557     | 10.9     | 10.79    | 13.7       | 14.542     |
| 19           | 8.9        | 8.0768     | 11.1     | 10.953   | 13.9       | 14.734     |
| 20           | 9.1        | 8.1982     | 11.3     | 11.112   | 14.2       | 14.924     |
| 21           | 9.2        | 8.3207     | 11.5     | 11.269   | 14.5       | 15.115     |
| 22           | 9.4        | 8.4447     | 11.8     | 11.424   | 14.7       | 15.306     |
| 23           | 9.5        | 8.5706     | 12       | 11.578   | 15         | 15.499     |
| 24           | 9.7        | 8.6984     | 12.2     | 11.733   | 15.3       | 15.696     |
| 25           | 9.8        | 8.8281     | 12.4     | 11.887   | 15.5       | 15.895     |
| 26           | 10         | 8.9589     | 12.5     | 12.041   | 15.8       | 16.097     |
| 27           | 10.1       | 9.0902     | 12.7     | 12.195   | 16.1       | 16.299     |
| 28           | 10.2       | 9.2218     | 12.9     | 12.348   | 16.3       | 16.504     |
| 29           | 10.4       | 9.3537     | 13.1     | 12.502   | 16.6       | 16.71      |

Source: El Mouzan MI, Shaffi A, Al Salloum A, Alqurashi MM, Al Herbish A, Al Omer A. Z-score growth reference data for Saudi preschool children. Ann Saudi Med 2017; 37(1): 10-15.

|    |      |        |      |        |      |        |
|----|------|--------|------|--------|------|--------|
| 30 | 10.5 | 9.4859 | 13.3 | 12.655 | 16.9 | 16.919 |
| 31 | 10.7 | 9.6184 | 13.5 | 12.81  | 17.1 | 17.131 |
| 32 | 10.8 | 9.751  | 13.7 | 12.964 | 17.4 | 17.346 |
| 33 | 10.9 | 9.883  | 13.8 | 13.119 | 17.6 | 17.563 |
| 34 | 11   | 10.014 | 14   | 13.274 | 17.8 | 17.781 |
| 35 | 11.2 | 10.144 | 14.2 | 13.429 | 18.1 | 18     |
| 36 | 11.3 | 10.272 | 14.3 | 13.583 | 18.3 | 18.219 |
| 37 | 11.4 | 10.4   | 14.5 | 13.737 | 18.6 | 18.44  |
| 38 | 11.5 | 10.526 | 14.7 | 13.891 | 18.8 | 18.662 |
| 39 | 11.6 | 10.651 | 14.8 | 14.045 | 19   | 18.884 |
| 40 | 11.8 | 10.773 | 15   | 14.199 | 19.3 | 19.107 |
| 41 | 11.9 | 10.894 | 15.2 | 14.353 | 19.5 | 19.328 |
| 42 | 12   | 11.011 | 15.3 | 14.506 | 19.7 | 19.55  |
| 43 | 12.1 | 11.125 | 15.5 | 14.657 | 20   | 19.769 |
| 44 | 12.2 | 11.234 | 15.7 | 14.806 | 20.2 | 19.984 |
| 45 | 12.4 | 11.338 | 15.8 | 14.951 | 20.5 | 20.195 |
| 46 | 12.5 | 11.436 | 16   | 15.093 | 20.7 | 20.401 |
| 47 | 12.6 | 11.527 | 16.2 | 15.23  | 20.9 | 20.6   |
| 48 | 12.7 | 11.614 | 16.3 | 15.364 | 21.2 | 20.795 |
| 49 | 12.8 | 11.695 | 16.5 | 15.495 | 21.4 | 20.986 |
| 50 | 12.9 | 11.772 | 16.7 | 15.623 | 21.7 | 21.172 |
| 51 | 13.1 | 11.843 | 16.8 | 15.748 | 21.9 | 21.354 |
| 52 | 13.2 | 11.909 | 17   | 15.87  | 22.2 | 21.533 |
| 53 | 13.3 | 11.971 | 17.2 | 15.989 | 22.4 | 21.708 |
| 54 | 13.4 | 12.029 | 17.3 | 16.106 | 22.7 | 21.88  |
| 55 | 13.5 | 12.081 | 17.5 | 16.219 | 22.9 | 22.047 |
| 56 | 13.6 | 12.129 | 17.7 | 16.329 | 23.2 | 22.211 |
| 57 | 13.7 | 12.174 | 17.8 | 16.437 | 23.4 | 22.372 |
| 58 | 13.8 | 12.215 | 18   | 16.542 | 23.7 | 22.531 |
| 59 | 14   | 12.254 | 18.2 | 16.646 | 23.9 | 22.688 |

Source: El Mouzan MI, Shaffi A, Al Salloum A, Alqurashi MM, Al Herbish A, Al Omer A. Z-score growth reference data for Saudi preschool children. Ann Saudi Med 2017; 37(1): 10-15.
