# Supplementary material for: Z-score growth reference data for Saudi preschool children
Source: PubMed Central journal article supplement — Ann Saudi Med. 2017 Jan-Feb;37(1):10–5. doi: 10.5144/0256-4947.2017.10 (PMC6148975; doi:10.5144/0256-4947.2017.10), 2017
Supplement: asm-37-1-10-s013.pdf [file asm-37-1-10-s013.pdf]

**Appendix 13.** Comparison of CDC and Saudi z-score reference for weight for age for boys.

| Age (months) | CDC (-2SD) | KSA (-2SD) | CDC 0      | KSA 0    | CDC (+2SD) | KSA (+2SD) |
|--------------|------------|------------|------------|----------|------------|------------|
| 0            | 2.26484    | 2.46826    | 3.53020317 | 3.15546  | 4.49936345 | 4.417946   |
| 1            | 3.12142    | 3.159147   | 4.44131575 | 4.058456 | 5.64831225 | 5.673368   |
| 2            | 3.89557    | 3.810123   | 5.27620692 | 4.918971 | 6.7011356  | 6.865099   |
| 3            | 4.58478    | 4.397883   | 6.03214037 | 5.705798 | 7.65216572 | 7.949677   |
| 4            | 5.19985    | 4.915244   | 6.71661421 | 6.408007 | 8.50930948 | 8.912091   |
| 5            | 5.74965    | 5.363878   | 7.33613081 | 7.02606  | 9.28094746 | 9.753344   |
| 6            | 6.24169    | 5.748542   | 7.89668811 | 7.56454  | 9.97525768 | 10.48      |
| 7            | 6.68255    | 6.07596    | 8.40389176 | 8.030624 | 10.5999878 | 11.10259   |
| 8            | 7.07804    | 6.355683   | 8.86297615 | 8.435232 | 11.16238   | 11.63726   |
| 9            | 7.43336    | 6.597405   | 9.27881006 | 8.789712 | 11.6691548 | 12.10052   |
| 10           | 7.75319    | 6.809033   | 9.655904   | 9.103397 | 12.1265207 | 12.50543   |
| 11           | 8.04176    | 6.996242   | 9.99842168 | 9.383076 | 12.5401944 | 12.86085   |
| 12           | 8.53994    | 7.163531   | 10.5947398 | 9.63423  | 13.2570257 | 13.17391   |
| 13           | 8.75607    | 7.314399   | 10.8552752 | 9.861126 | 13.569392  | 13.4502    |
| 14           | 8.95405    | 7.453364   | 11.0947401 | 10.06911 | 13.8565375 | 13.69832   |
| 15           | 9.13637    | 7.584436   | 11.3158115 | 10.26294 | 14.1221142 | 13.92628   |
| 16           | 9.30528    | 7.710561   | 11.5209223 | 10.44608 | 14.3694389 | 14.14008   |
| 17           | 9.46276    | 7.833909   | 11.712278  | 10.62114 | 14.6015155 | 14.34423   |
| 18           | 9.6106     | 7.9557     | 11.8918727 | 10.78963 | 14.821057  | 14.54152   |
| 19           | 9.75037    | 8.076787   | 12.0615048 | 10.95275 | 15.0305064 | 14.73408   |
| 20           | 9.88348    | 8.198218   | 12.2227922 | 11.11209 | 15.2320553 | 14.92449   |
| 21           | 10.0111    | 8.320716   | 12.3771857 | 11.26888 | 15.4276627 | 15.11465   |
| 22           | 10.1344    | 8.444742   | 12.5259826 | 11.42404 | 15.6190715 | 15.30588   |
| 23           | 10.2543    | 8.570594   | 12.6703395 | 11.57844 | 15.8078245 | 15.49929   |
| 24           | 10.3715    | 8.69844    | 12.8112834 | 11.73279 | 15.9952793 | 15.69575   |
| 25           | 10.4867    | 8.828088   | 12.9497233 | 11.88726 | 16.1826229 | 15.89522   |
| 26           | 10.6007    | 8.958902   | 13.0865832 | 12.04148 | 16.3707319 | 16.09674   |
| 27           | 10.7136    | 9.090194   | 13.2221966 | 12.19514 | 16.5609462 | 16.29946   |
| 28           | 10.8262    | 9.221774   | 13.3575454 | 12.34842 | 16.75356   | 16.50365   |
| 29           | 10.9386    | 9.353677   | 13.4930376 | 12.50171 | 16.9493537 | 16.70995   |
| 30           | 11.0512    | 9.485934   | 13.6291299 | 12.65535 | 17.1488451 | 16.91895   |
| 31           | 11.1642    | 9.618439   | 13.7662124 | 12.80958 | 17.3524491 | 17.13095   |
| 32           | 11.2776    | 9.750967   | 13.904414  | 12.96442 | 17.5600657 | 17.34586   |
| 33           | 11.3918    | 9.883008   | 14.0446072 | 13.11946 | 17.7732129 | 17.56292   |
| 34           | 11.5066    | 10.014     | 14.1864143 | 13.27419 | 17.9907877 | 17.78102   |
| 35           | 11.6222    | 10.14376   | 14.3299444 | 13.4285  | 18.2128929 | 17.99972   |
| 36           | 11.7387    | 10.27237   | 14.4758576 | 13.58262 | 18.4404456 | 18.21933   |
| 37           | 11.8561    | 10.39985   | 14.6240023 | 13.73682 | 18.673014  | 18.44014   |
| 38           | 11.9743    | 10.52602   | 14.7744447 | 13.89111 | 18.9105586 | 18.66199   |
| 39           | 12.0934    | 10.65061   | 14.927223  | 14.04535 | 19.1530045 | 18.88435   |
| 40           | 12.2133    | 10.77322   | 15.082346  | 14.19928 | 19.4002544 | 19.10652   |
| 41           | 12.334     | 10.89363   | 15.2398057 | 14.3529  | 19.6521798 | 19.32847   |
| 42           | 12.4554    | 11.01121   | 15.3995704 | 14.50574 | 19.9086417 | 19.54958   |
| 43           | 12.5776    | 11.12511   | 15.5615934 | 14.65705 | 20.169487  | 19.76874   |
| 44           | 12.7004    | 11.23432   | 15.7258136 | 14.8058  | 20.4345543 | 19.98442   |

Source: El Mouzan MI, Shaffi A, Al Salloum A, Alqurashi MM, Al Herbish A, Al Omer A. Z-score growth reference data for Saudi preschool children. Ann Saudi Med 2017; 37(1): 10-15.

| Age (months) | CDC (-2SD) | KSA (-2SD) | CDC 0      | KSA 0    | CDC (+2SD) | KSA (+2SD) |
|--------------|------------|------------|------------|----------|------------|------------|
| 45           | 12.8239    | 11.33797   | 15.8921602 | 14.95113 | 20.7036757 | 20.19528   |
| 46           | 12.9481    | 11.43562   | 16.0605489 | 15.0925  | 20.9766891 | 20.40051   |
| 47           | 13.0728    | 11.52742   | 16.230892  | 15.23008 | 21.2534284 | 20.60035   |
| 48           | 13.1981    | 11.61389   | 16.4030956 | 15.36432 | 21.5337336 | 20.79549   |
| 49           | 13.3239    | 11.69532   | 16.577062  | 15.49547 | 21.8174518 | 20.98621   |
| 50           | 13.4502    | 11.77163   | 16.7526919 | 15.6234  | 22.1044387 | 21.17244   |
| 51           | 13.577     | 11.84286   | 16.9298854 | 15.74815 | 22.3945601 | 21.35443   |
| 52           | 13.7043    | 11.90931   | 17.1085433 | 15.86997 | 22.6876934 | 21.53277   |
| 53           | 13.8321    | 11.97128   | 17.2885681 | 15.98917 | 22.9837286 | 21.70794   |
| 54           | 13.9603    | 12.02863   | 17.4698653 | 16.10551 | 23.2825694 | 21.8796    |
| 55           | 14.0891    | 12.08125   | 17.6523456 | 16.21873 | 23.5841305 | 22.04735   |
| 56           | 14.2183    | 12.12937   | 17.8359194 | 16.32892 | 23.8883491 | 22.21131   |
| 57           | 14.3479    | 12.17356   | 18.0205066 | 16.4365  | 24.1951702 | 22.3721    |
| 58           | 14.4781    | 12.21468   | 18.2060312 | 16.54207 | 24.5045558 | 22.53061   |

Source: El Mouzan MI, Shaffi A, Al Salloum A, Alqurashi MM, Al Herbish A, Al Omer A. Z-score growth reference data for Saudi preschool children. Ann Saudi Med 2017; 37(1): 10-15.
