# Supplementary material for: Z-score growth reference data for Saudi preschool children
Source: PubMed Central journal article supplement — Ann Saudi Med. 2017 Jan-Feb;37(1):10–5. doi: 10.5144/0256-4947.2017.10 (PMC6148975; doi:10.5144/0256-4947.2017.10), 2017
Supplement: asm-37-1-10-s014.pdf [file asm-37-1-10-s014.pdf]

**Appendix 14.** Comparison of CDC and Saudi z-score reference for length/height for age for boys.

| Age (months) | CDC (-2SD) | KSA (-2SD) | CDC 0      | KSA 0    | CDC (+2SD) | KSA (+2SD) |
|--------------|------------|------------|------------|----------|------------|------------|
| 0            | 44.5991197 | 46.21217   | 49.9888841 | 50.57602 | 55.2274297 | 56.38376   |
| 1            | 49.8109919 | 48.98096   | 54.6622019 | 53.74355 | 59.9706438 | 60.13776   |
| 2            | 53.4706094 | 51.64881   | 58.118691  | 56.81033 | 63.5087375 | 63.75504   |
| 3            | 56.2424676 | 54.1276    | 60.8429769 | 59.67986 | 66.3308208 | 67.08037   |
| 4            | 58.5241544 | 56.36948   | 63.1469322 | 62.30298 | 68.7345318 | 70.02219   |
| 5            | 60.4882436 | 58.34317   | 65.1710895 | 64.65456 | 70.856582  | 72.53635   |
| 6            | 62.2270729 | 60.02363   | 66.9927474 | 66.72834 | 72.7730758 | 74.6111    |
| 7            | 63.7964469 | 61.40789   | 68.6596322 | 68.53925 | 74.5314205 | 76.30225   |
| 8            | 65.2329375 | 62.54087   | 70.2035619 | 70.13326 | 76.163449  | 77.73318   |
| 9            | 66.5619477 | 63.49252   | 71.6469501 | 71.56539 | 77.6917221 | 79.01737   |
| 10           | 67.8019158 | 64.35099   | 73.0062576 | 72.88995 | 79.1328971 | 80.24224   |
| 11           | 68.9666919 | 65.19634   | 74.2939756 | 74.14188 | 80.4996716 | 81.4585    |
| 12           | 70.0669731 | 66.10107   | 75.5198363 | 75.33276 | 81.801979  | 82.68396   |
| 13           | 71.1112128 | 67.11347   | 76.6915872 | 76.46193 | 83.0477593 | 83.91646   |
| 14           | 72.1062195 | 68.20135   | 77.8155111 | 77.5274  | 84.2434727 | 85.1396    |
| 15           | 73.0575669 | 69.30466   | 78.8967818 | 78.52913 | 85.394456  | 86.33515   |
| 16           | 73.9698825 | 70.38158   | 79.9397177 | 79.47268 | 86.5051766 | 87.49405   |
| 17           | 74.8470549 | 71.40448   | 80.9479655 | 80.36989 | 87.5794172 | 88.61299   |
| 18           | 75.6923871 | 72.35592   | 81.9246362 | 81.23001 | 88.6204129 | 89.68765   |
| 19           | 76.5087115 | 73.23568   | 82.8724085 | 82.06313 | 89.6309552 | 90.72782   |
| 20           | 77.2984773 | 74.05724   | 83.7936073 | 82.8812  | 90.6134723 | 91.74973   |
| 21           | 78.0638182 | 74.83355   | 84.6902653 | 83.69051 | 91.5700914 | 92.75687   |
| 22           | 78.806605  | 75.57153   | 85.5641727 | 84.4917  | 92.5026865 | 93.74136   |
| 23           | 79.5284919 | 76.26687   | 86.416912  | 85.27979 | 93.4129228 | 94.69071   |
| 24           | 80.230947  | 76.91632   | 87.2498922 | 86.05149 | 94.3022845 | 95.59916   |
| 25           | 80.9497666 | 77.5245    | 88.0570411 | 86.8067  | 95.2092536 | 96.46542   |
| 26           | 81.6869607 | 78.09861   | 88.8378686 | 87.547   | 96.1301249 | 97.2947    |
| 27           | 82.4088633 | 78.65152   | 89.5993783 | 88.27386 | 97.0222618 | 98.097     |
| 28           | 83.1168709 | 79.19872   | 90.3429504 | 88.98704 | 97.8870073 | 98.88058   |
| 29           | 83.8121642 | 79.74262   | 91.0697431 | 89.68436 | 98.7256957 | 99.6473    |
| 30           | 84.4957409 | 80.28564   | 91.7807507 | 90.36747 | 99.5396594 | 100.4022   |
| 31           | 85.16845   | 80.83346   | 92.4768477 | 91.04003 | 100.330238 | 101.1513   |
| 32           | 85.8310224 | 81.39027   | 93.1588256 | 91.70291 | 101.098782 | 101.8968   |
| 33           | 86.4840981 | 81.95515   | 93.8274225 | 92.35574 | 101.846657 | 102.6347   |
| 34           | 87.1282515 | 82.52545   | 94.4833474 | 92.99917 | 102.575244 | 103.3591   |
| 35           | 87.7640129 | 83.09519   | 95.1272995 | 93.63506 | 103.285941 | 104.0702   |
| 36           | 88.3918926 | 83.6594    | 95.7599804 | 94.26514 | 103.980168 | 104.7705   |
| 37           | 88.239841  | 84.22051   | 95.5952754 | 94.89258 | 103.783488 | 105.4678   |
| 38           | 88.7827333 | 84.78913   | 96.2320825 | 95.52284 | 104.436774 | 106.1746   |
| 39           | 89.3177495 | 85.3765    | 96.8605984 | 96.1609  | 105.084581 | 106.8989   |
| 40           | 89.8453347 | 85.98858   | 97.4813532 | 96.8083  | 105.727369 | 107.6418   |
| 41           | 90.365952  | 86.62415   | 98.094849  | 97.46544 | 106.365588 | 108.4025   |
| 42           | 90.8800628 | 87.27615   | 98.7015742 | 98.12821 | 106.99966  | 109.1709   |
| 43           | 91.3881377 | 87.93941   | 99.3019927 | 98.7894  | 107.629994 | 109.9315   |
| 44           | 91.8906471 | 88.60797   | 99.8965499 | 99.44069 | 108.256977 | 110.6683   |

Source: El Mouzan MI, Shaffi A, Al Salloum A, Alqurashi MM, Al Herbish A, Al Omer A. Z-score growth reference data for Saudi preschool children. Ann Saudi Med 2017; 37(1): 10-15.

| Age (months) | CDC (-2SD) | KSA (-2SD) | CDC 0      | KSA 0    | CDC (+2SD) | KSA (+2SD) |
|--------------|------------|------------|------------|----------|------------|------------|
| 45           | 92.3880615 | 89.27336   | 100.485671 | 100.0754 | 108.880973 | 111.3658   |
| 46           | 92.8808473 | 89.9267    | 101.069761 | 100.689  | 109.502331 | 112.0128   |
| 47           | 93.3694655 | 90.55778   | 101.649208 | 101.2785 | 110.121374 | 112.6038   |
| 48           | 93.8543684 | 91.15382   | 102.22438  | 101.8398 | 110.738407 | 113.1344   |
| 49           | 94.3359988 | 91.7065    | 102.795628 | 102.3732 | 111.353713 | 113.6123   |
| 50           | 94.8147871 | 92.21362   | 103.363284 | 102.882  | 111.967556 | 114.0581   |
| 51           | 95.2911498 | 92.67393   | 103.927662 | 103.3707 | 112.580178 | 114.4862   |
| 52           | 95.765489  | 93.08694   | 104.489057 | 103.8417 | 113.191804 | 114.9035   |
| 53           | 96.2381839 | 93.45528   | 105.047751 | 104.2983 | 113.802634 | 115.3142   |
| 54           | 96.7096082 | 93.77944   | 105.603998 | 104.7412 | 114.412859 | 115.7165   |
| 55           | 97.1801003 | 94.0603    | 106.158045 | 105.1721 | 115.02264  | 116.1095   |
| 56           | 97.6499861 | 94.29928   | 106.710117 | 105.5937 | 115.632126 | 116.4952   |
| 57           | 98.1195667 | 94.49361   | 107.26042  | 106.0069 | 116.241446 | 116.8768   |
| 58           | 98.5891199 | 94.6468    | 107.809144 | 106.4152 | 116.850713 | 117.2595   |
| 59           | 99.0588985 | 94.76972   | 108.356464 | 106.8234 | 117.460021 | 117.6479   |

Source: El Mouzan MI, Shaffi A, Al Salloum A, Alqurashi MM, Al Herbish A, Al Omer A. Z-score growth reference data for Saudi preschool children. Ann Saudi Med 2017; 37(1): 10-15.
